# Supplementary material for: Detection of Reproducible Major Effect QTL for Petal Traits in Garden Roses
Source: MDPI journal article supplement (doi:10.3390/plants10050897), 2021-04-29
Supplement: s1 [file s1]

## FIGURES

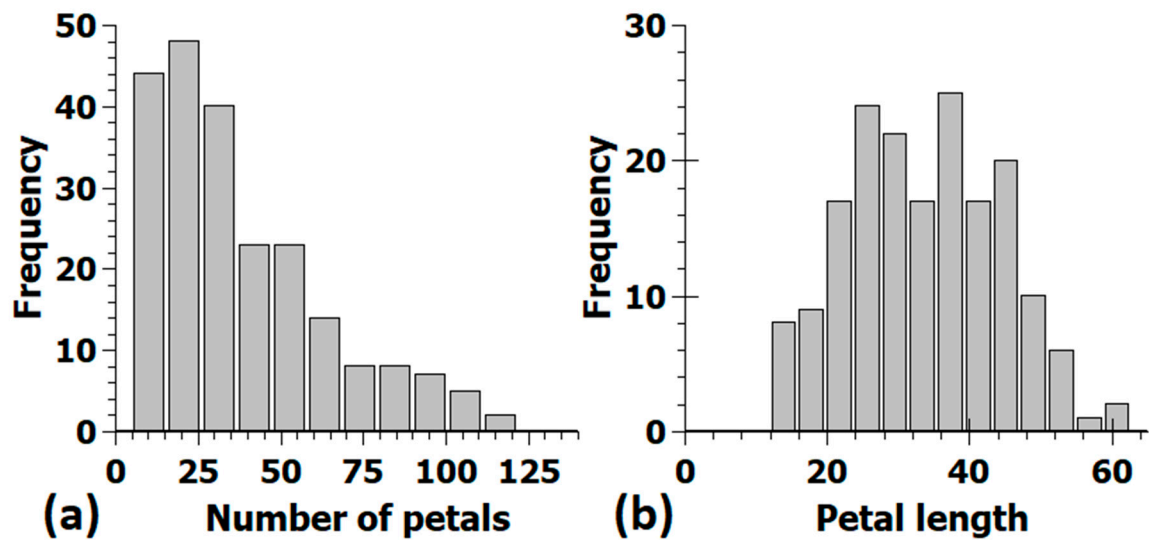

**Suppl. Figure S1.** Skewed distribution of 223 cultivars for the validation of petal number and normal distribution of petal length in the validation population for 179 cultivars (b).

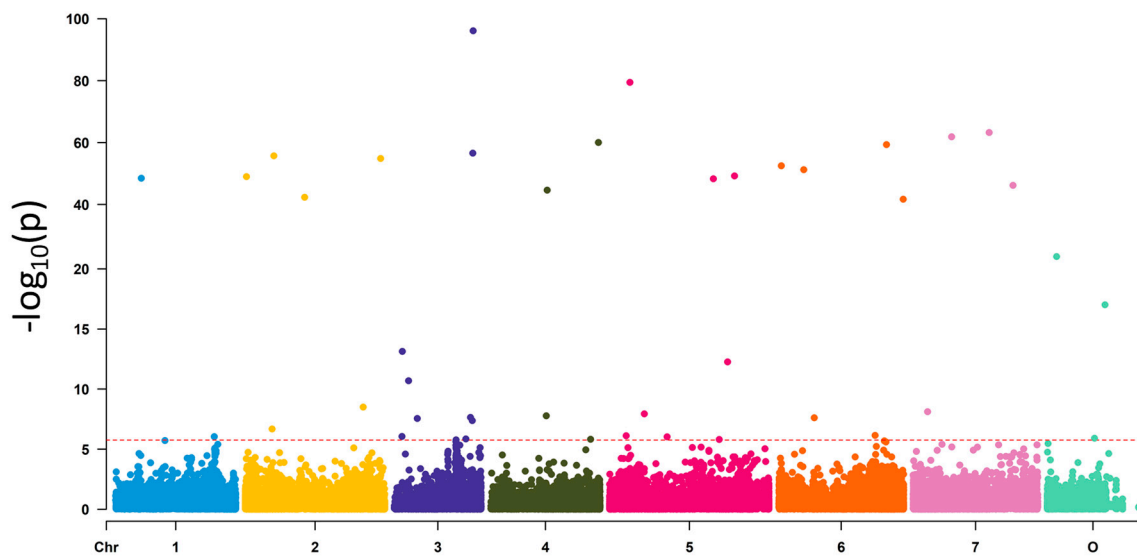

**Suppl. Figure S2.** Manhattan plot of associations between 63,000 SNP-markers and petal number in a set of 95 garden roses. The x-axis represents the chromosomes of *Rosa chinensis*, including chromosome 0 with contigs not assigned to a precise location to date. Associations were calculated in Tassel 3.0 using MLM including population structure (Q) and kinship (K) and Box-Cox transformed data for petal number. Red dotted line indicates the Bonferroni corrected level of significance ( $-\log_{10} = 5.75$ ).

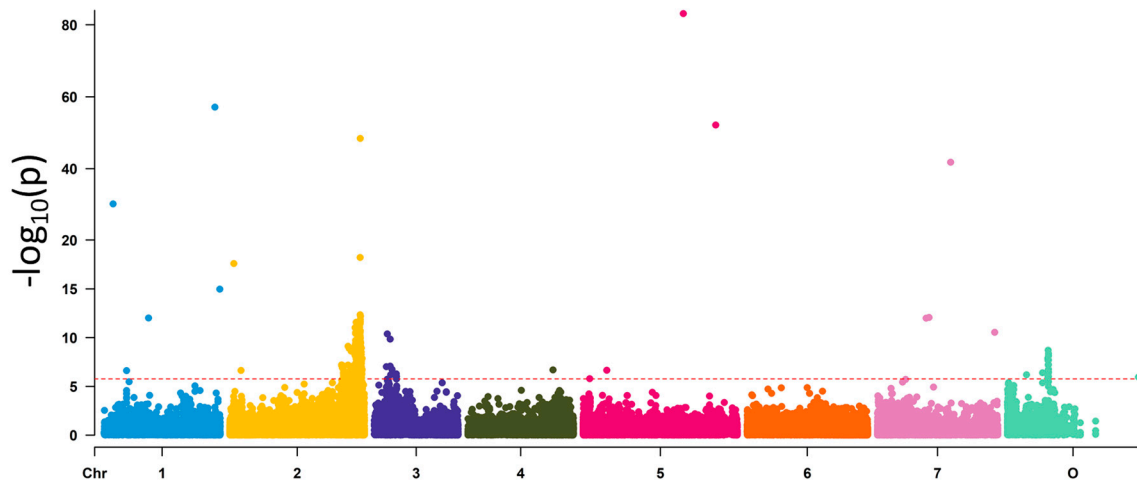

**Suppl. Figure S3.** Manhattan plot of associations between 63,000 SNP-markers and fragrance in of a set of 95 garden roses. The x-axis represents the chromosomes of *Rosa chinensis*, including chromosome 0 with contigs not assigned to a precise location to date. Associations were calculated in Tassel 3.0 using MLM including population structure (Q) and kinship (K) and Box-Cox transformed data of fragrance. Red dotted line indicates the Bonferroni corrected level of significance ( $-\log_{10}= 5.75$ ).

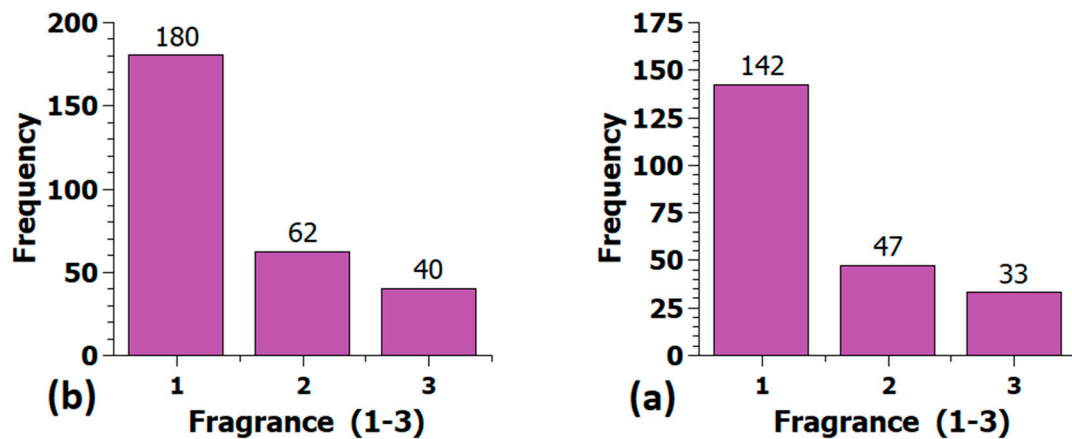

**Suppl. Figure S4.** Distribution of fragrance in the population for validation with 222 cultivars for KASP marker Rh\_FR\_SNP139K (a) and with 282 cultivars for KASP marker Rh\_FR\_SNP201K (b).

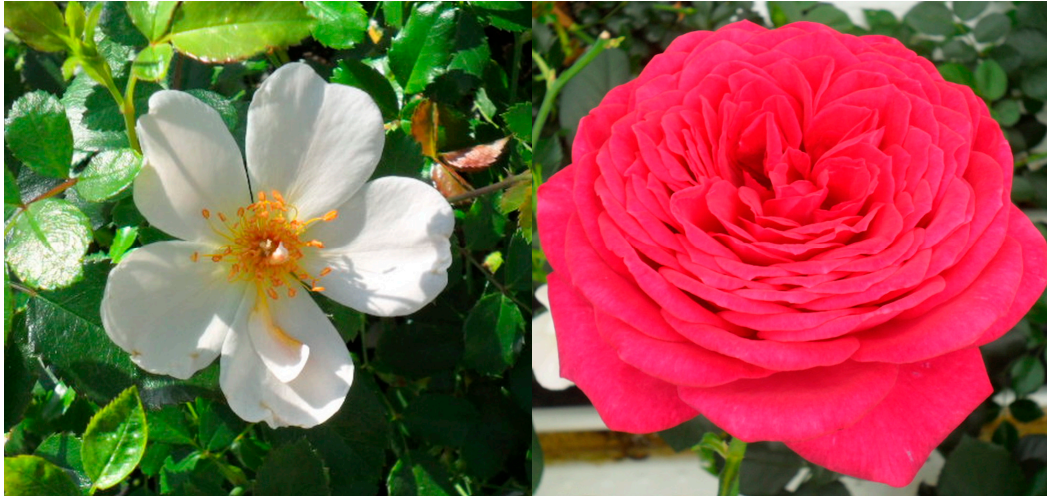

**Suppl. Figure S5.** Examples for single flowered roses (left; cultivar 'Cute Haze' with 6 petals) and very full flowered roses (right; cultivar 'Goethe Rose' with more than 100 petals).

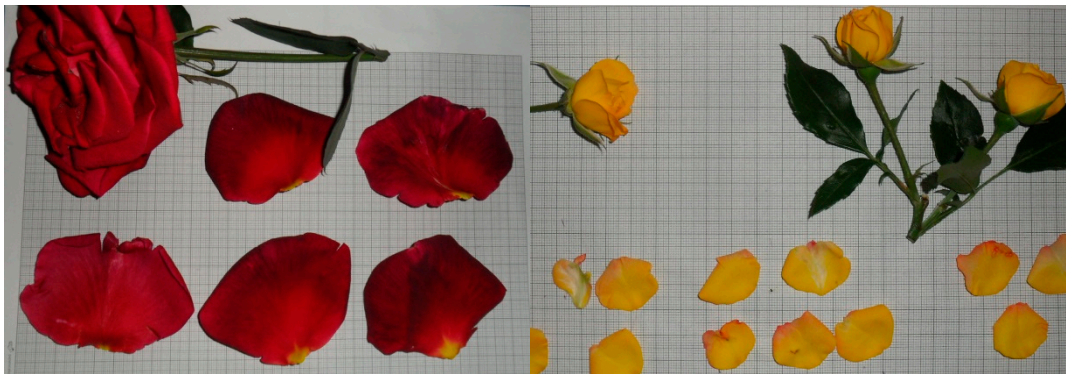

**Suppl. Figure S6.** Examples for roses with long petals (left; cultivar 'Mister Lincoln' with a petal length  $> 60\text{mm}$ ) and very short petals (right; cultivar 'Rumba' with a petal length  $< 25\text{ mm}$ ).

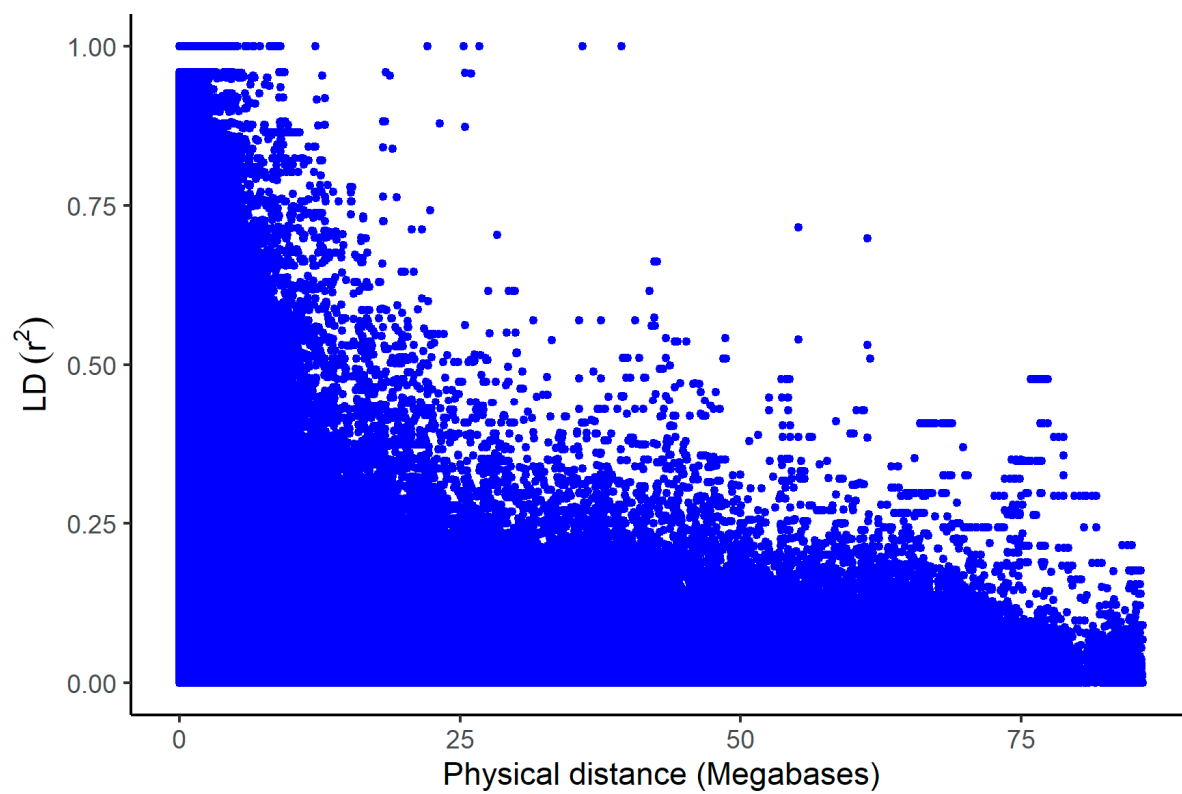

**Suppl. Figure S7.** Genome wide LD decay plot.

## TABLES

**Suppl. Table S1.** Distribution of allele dosage of KASP marker Rh\_PN\_SNP5K for petal number in the association panel of 95 cultivars.

| No. | Cultivar            | Petals (n) | SNP Dosage | No. | Cultivar               | Petals (n) | SNP Dosage |
|-----|---------------------|------------|------------|-----|------------------------|------------|------------|
| 134 | Albrecht Dürer Rose | 82.32      | 0          | 72  | Arabia                 | 28.22      | 1          |
| 37  | Alinka              | 31.52      | 0          | 44  | Arthur Bell            | 40.08      | 1          |
| 38  | Auslo               | 85.42      | 0          | 55  | Ausfather              | 61.18      | 1          |
| 104 | Beverly             | 55.04      | 0          | 39  | Ausmas                 | 51.53      | 1          |
| 136 | Bienenweide         | 7.52       | 0          | 85  | Berolina               | 38.83      | 1          |
| 53  | Celine Delbard      | 29.62      | 0          | 36  | Black Baccara          | 45.81      | 1          |
| 49  | Compassion          | 39.02      | 0          | 66  | Black Magic            | 52.65      | 1          |
| 46  | Comtesse de Ségur   | 31.5       | 0          | 67  | China Girl             | 77.72      | 1          |
| 140 | Crimson Glory       | 31.7       | 0          | 10  | Chippendale            | 119.38     | 1          |
| 95  | Dortmund            | 7.25       | 0          | 69  | Comtessa AL            | 95.74      | 1          |
| 132 | Duftwolke           | 41.07      | 0          | 131 | Cute Haze              | 7.87       | 1          |
| 115 | Focus               | 32.34      | 0          | 111 | Donauprinzessin        | 69.32      | 1          |
| 92  | Frühlingsduft       | 23         | 0          | 75  | Elfe                   | 79.67      | 1          |
| 15  | George Vancouver    | 23.28      | 0          | 13  | Feuerwerk              | 16         | 1          |
| 133 | Goethe Rose         | 107.17     | 0          | 59  | France Libre           | 24.65      | 1          |
| 24  | Heidetraum          | 27.48      | 0          | 96  | Friesia                | 37.24      | 1          |
| 100 | Herkules            | 69.3       | 0          | 103 | Fritz Nobis            | 20.67      | 1          |
| 120 | Herzogin Friederike | 30.17      | 0          | 14  | Gebrüder Grimm         | 43.07      | 1          |
| 18  | Jasmina             | 65.07      | 0          | 73  | Hansestadt Rostock     | 26.99      | 1          |
| 105 | Juanita             | 5.07       | 0          | 17  | Heidi Klum             | 96.42      | 1          |
| 16  | König Stanislaus    | 30.01      | 0          | 77  | Jazz                   | 15.57      | 1          |
| 118 | Kronjuwel           | 19.93      | 0          | 74  | Kastelruther Spatzen   | 76.44      | 1          |
| 41  | La Sevillana        | 19.6       | 0          | 84  | Knock Out              | 12.64      | 1          |
| 70  | Lipstick            | 23.63      | 0          | 94  | Lavender Lassie        | 51.6       | 1          |
| 71  | Midsummer           | 53.89      | 0          | 137 | Lolita                 | 48.24      | 1          |
| 42  | Mister Lincoln      | 33.5       | 0          | 54  | Louise Odier           | 75.68      | 1          |
| 47  | Mme Boll            | 91.11      | 0          | 138 | Magenta                | 78.6       | 1          |
| 57  | Mme Knorr           | 110.78     | 0          | 81  | Mariatheresia          | 128.67     | 1          |
| 62  | Mrs John Laing      | 60.11      | 0          | 32  | Mevrouw Nathal. Nypels | 80.78      | 1          |
| 112 | Münsterland         | 30         | 0          | 35  | Mitsouko               | 71.6       | 1          |
| 4   | Nemo                | 5.83       | 0          | 80  | My Girl                | 115.38     | 1          |
| 28  | New Dawn            | 41.63      | 0          | 58  | Papageno               | 31.17      | 1          |
| 26  | Nostalgie           | 38.02      | 0          | 56  | Perpetually Yours      | 197        | 1          |
| 1   | Parole              | 37.57      | 0          | 52  | Rose de Resht          | 126.55     | 1          |
| 68  | Perennial Blush     | 12.66      | 0          | 139 | Rose Gaujard           | 54.21      | 1          |
| 2   | Queen Elizabeth     | 31.51      | 0          | 43  | Rumba                  | 33.76      | 1          |
| 99  | Raubritter          | 24.47      | 0          | 3   | Schneewittchen         | 28.05      | 1          |
| 51  | Scarlet Meidiland   | 18.88      | 0          | 93  | Sebastian Kneipp       | 108.5      | 1          |
| 40  | Shalom              | 51.06      | 0          | 141 | Sunset Boulevard       | 22         | 1          |
| 116 | Simply              | 17.2       | 0          | 119 | Tornella               | 33.06      | 1          |
| 27  | Sommerwind          | 19.6       | 0          | 12  | Blue Parfum            | 51.45      | 2          |
| 20  | Sonnenschirm        | 38.22      | 0          | 122 | Blue River             | 45.9       | 2          |
| 135 | Stadt Rom           | 5.8        | 0          | 79  | Dukat                  | 24         | 2          |
| 5   | Super Star          | 36.72      | 0          | 78  | Mainzer Fastnacht      | 41.5       | 2          |
| 50  | Sutters Gold        | 19.92      | 0          | 61  | Princess Alexandre     | 52.74      | 2          |
| 114 | Venice              | 5.46       | 0          | 6   | Small Maidens Blush    | 128.77     | 2          |
| 89  | Westerland          | 23.5       | 0          | 97  | Sterntaler             | 79.75      | 2          |
| 110 | Windrose            | 16.33      | 0          |     |                        |            |            |

**Suppl. Table S2.** Validation of KASP marker Rh\_PN\_SNP5K for petal number with 223 independent rose cultivars.

| Cultivar                      | SNP dosage | Petal (n) | Cultivar                        | SNP dosage | Petals (n) | Cultivar                   | SNP dosage | Petals (n) |
|-------------------------------|------------|-----------|---------------------------------|------------|------------|----------------------------|------------|------------|
| Alden Biesen                  | 0          | 6         | Pastella                        | 0          | 66         | Gartenspaß                 | 1          | 57.5       |
| Alpenglühén                   | 0          | 9.33      | Perennial Blue                  | 0          | 30.5       | Gentile Harmonie           | 1          | 67.33      |
| Anda                          | 0          | 6         | Petticoat                       | 0          | 30.33      | Goldelse                   | 1          | 48         |
| Annelies                      | 0          | 46        | Piano                           | 0          | 95.5       | Golden Monica              | 1          | 23         |
| Antique Silk                  | 0          | 30.33     | Pink Bassino                    | 0          | 7          | Golden Silk                | 1          | 28.67      |
| Apache                        | 0          | 5.25      | Planten un Blumen               | 0          | 32         | Golden Wings               | 1          | 5          |
| Ascot                         | 0          | 63.25     | Pomponella                      | 0          | 54.2       | Goldmarie 82               | 1          | 23.44      |
| Aspirin Rose                  | 0          | 32.53     | Pretty Pink                     | 0          | 5          | Goldschatz                 | 1          | 32         |
| Astrid Gräfin. von Hardenberg | 0          | 71        | Princesse Josephine - Charlotte | 0          | 57.4       | Grete Schichedanz          | 1          | 38.33      |
| Bad Wörishofen 2005           | 0          | 21        | Puccini                         | 0          | 5.67       | Helene de Gerlach          | 1          | 24.5       |
| Barkarole                     | 0          | 35        | Purple Kiss                     | 0          | 11.33      | Hella                      | 1          | 19         |
| Bel Esprit                    | 0          | 5         | Purple Roadrunner               | 0          | 60         | Inka                       | 1          | 90         |
| Bienenweide apricot           | 0          | 6.17      | Ravel                           | 0          | 5          | Juwena                     | 1          | 42.67      |
| Bienenweide gelb              | 0          | 23.55     | Red Haze                        | 0          | 6          | Lady Rose                  | 1          | 21.5       |
| Bienenweide rot               | 0          | 5         | Robusta                         | 0          | 5          | Ladybird                   | 1          | 41         |
| Blühwunder 08                 | 0          | 15.67     | Rodeo                           | 0          | 14.67      | Lampion                    | 1          | 49.44      |
| Brigitte de Villenjagne       | 0          | 30.2      | Rody                            | 0          | 33.67      | Liebeszauber               | 1          | 35.5       |
| Camelot                       | 0          | 39.25     | Rokoko                          | 0          | 21.5       | Maria Teresa               | 1          | 24.5       |
| Capricia                      | 0          | 32.5      | Romanze                         | 0          | 16.2       | Maxim                      | 1          | 55.22      |
| Catherine Laborde             | 0          | 31.33     | Rosanna                         | 0          | 57.5       | Meimelliac                 | 1          | 65         |
| Cherry Girl                   | 0          | 31.5      | Rosario                         | 0          | 30         | Memoire                    | 1          | 50         |
| Christel von der Post         | 0          | 33        | Rosarium Uetersen               | 0          | 85         | Mondial                    | 1          | 39.5       |
| Claire Jolly                  | 0          | 12        | Rose von Oldenburg              | 0          | 47.5       | Morning Sun                | 1          | 29         |
| Delicia                       | 0          | 22        | Rosenprof. Sieber               | 0          | 23.33      | Neige d'Ete                | 1          | 24         |
| Dinky                         | 0          | 35        | Rosenstadt Freising             | 0          | 30.75      | Omi Oswald                 | 1          | 9.5        |
| Easy to cut                   | 0          | 22.33     | Rosy Purple                     | 0          | 5          | Osiana                     | 1          | 25         |
| Eifelzauber                   | 0          | 71        | Roter Korsar                    | 0          | 15.5       | Pearl Mirato               | 1          | 32         |
| Elvis                         | 0          | 46.33     | Rotilia                         | 0          | 22         | Pink Roadrunner            | 1          | 25         |
| Emil Nolde Rose               | 0          | 30.67     | Running Maid                    | 0          | 5.33       | Postillion                 | 1          | 31.67      |
| Escimo                        | 0          | 5         | Sana Rose                       | 0          | 43.9       | Racquel                    | 1          | 30         |
| Fairest Cape                  | 0          | 24.4      | Satina                          | 0          | 22.67      | Rebell                     | 1          | 25         |
| Feeling                       | 0          | 18.67     | Schloß Ippenburg                | 0          | 13         | Romina                     | 1          | 82         |
| Felicita                      | 0          | 43.33     | Shanty                          | 0          | 24         | Rose de la Petit Chabote   | 1          | 33.5       |
| Felicitas                     | 0          | 5         | Sibelius                        | 0          | 20         | Rosenfee                   | 1          | 50         |
| Fils de Saison                | 0          | 6.67      | Sommerabend                     | 0          | 5.75       | Rosengrf. Marie Antoinette | 1          | 79.33      |
| Flash                         | 0          | 16        | Sonnenröschen                   | 0          | 5          | Rugelda                    | 1          | 34         |
| Fortissima                    | 0          | 5         | Souvenir de Baden Baden         | 0          | 49         | Scepter's Isle             | 1          | 49.2       |
| Fortuna                       | 0          | 5.33      | Sunny Rose                      | 0          | 22.67      | Schwarze Madonna           | 1          | 33         |
| Francoise Drion               | 0          | 5         | Sunny Sky                       | 0          | 44.25      | Sirius                     | 1          | 34.33      |
| Garden of Roses               | 0          | 95        | The Mayflower                   | 0          | 96.33      | Solero                     | 1          | 74.5       |
| Gelber Engel                  | 0          | 17.33     | Tornado                         | 0          | 18.3       | Sommersonne                | 1          | 44.5       |
| Giardinia                     | 0          | 94.4      | Ueters. Rosenkönigin            | 0          | 112        | Soul                       | 1          | 95         |
| Golden Tower                  | 0          | 51        | Uetersener Rosenprinzessin      | 0          | 103.5      | Strawberry                 | 1          | 88         |
| Hans Gönwein Rose             | 0          | 27        | Vodacom                         | 0          | 53.33      | Summer Memories            | 1          | 72.5       |
| Hansaland                     | 0          | 25.17     | Vogelpark Walsrode              | 0          | 12.5       | T06622                     | 1          | 90.2       |
| Harlow Carr                   | 0          | 121.67    | Waterloo                        | 0          | 53.33      | Uetersen. Klosterrose      | 1          | 45.38      |
| Heavenly Pink                 | 0          | 25        | White Chrystal                  | 0          | 5          | Ulmer Münster              | 1          | 31         |
| Home and Garden               | 0          | 55        | White Haze                      | 0          | 7.67       | Valencia                   | 1          | 50         |
| Internescori                  | 0          | 58.3      | White Magic                     | 0          | 5.4        | Vanilla Cream              | 1          | 23.33      |
| Jet Spray                     | 0          | 20        | Yellow light                    | 0          | 15         | Vif Eclat                  | 1          | 5          |
| Jour de Fete                  | 0          | 25        | Zwergfee 09                     | 0          | 27.5       | Walzertraum                | 1          | 56.33      |
| Kosmos                        | 0          | 68.67     | Acapella                        | 1          | 58.5       | Zaide                      | 1          | 132.5      |

|                                            |   |       |                             |   |       |                          |   |       |
|--------------------------------------------|---|-------|-----------------------------|---|-------|--------------------------|---|-------|
| La Perla                                   | 0 | 64    | Altera                      | 1 | 35.2  | Aperitif                 | 2 | 31    |
| Larissa                                    | 0 | 106   | Amber Sun                   | 1 | 16    | Avec Amour               | 2 | 31.4  |
| Lilly Marleen                              | 0 | 18    | Aphrodite                   | 1 | 42.83 | Bouquet Parfait          | 2 | 37.5  |
| Lions Rose                                 | 0 | 45    | Aprikola                    | 1 | 23.67 | Candela                  | 2 | 53.67 |
| Lupo                                       | 0 | 6     | Artemis                     | 1 | 85    | Candlelight              | 2 | 41.5  |
| Maaseik                                    | 0 | 6     | Augusta Luise               | 1 | 55    | Cubana                   | 2 | 26    |
| Mainaufeuer                                | 0 | 22.33 | Aya Renaissance             | 1 | 59.33 | Eskelund                 | 2 | 56.33 |
| Maria Mathilda                             | 0 | 17.67 | Bad Birnbach                | 1 | 28.67 | Golden Medaillon         | 2 | 31.5  |
| Marie-Luise Marjan                         | 0 | 30    | Belvedere                   | 1 | 15.8  | Jaqueline Humery         | 2 | 22.33 |
| Matador                                    | 0 | 12.5  | Bernstein-Rose              | 1 | 35    | Karl Ploberger           | 2 | 87    |
| Matchball                                  | 0 | 5     | Blanche Moreau              | 1 | 71    | Madame Bovary            | 2 | 29.5  |
| Medeo                                      | 0 | 9.3   | Bremer Stadt-<br>musikanten | 1 | 79    | Parfum de Grasse         | 2 | 45.75 |
| Mein schöner Garten                        | 0 | 35    | Bukavu Lenbrirus            | 1 | 5.67  | Playful Rokoko           | 2 | 64.33 |
| Melina                                     | 0 | 108   | Canary                      | 1 | 46    | Voyage                   | 2 | 109   |
| Mirato                                     | 0 | 23    | Caramella                   | 1 | 40    | Alabaster                | 3 | 81.67 |
| Mon Petit Chou                             | 0 | 77.5  | Centro Rose                 | 1 | 20    | Apricot Clementine       | 3 | 17.33 |
| Moneta                                     | 0 | 40.67 | Claus Dalby                 | 1 | 87.76 | Brokat - Tantakorb       | 3 | 40    |
| Mozart                                     | 0 | 5     | Deep Impression             | 1 | 50    | Freisinger<br>Morgenröte | 3 | 25    |
| Nathalie Renaissance                       | 0 | 105   | Domstadt Fulda              | 1 | 60    | Ninetta                  | 3 | 66.8  |
| NDR1 Radio                                 | 0 | 22.67 | Elmshorn                    | 1 | 52.67 | Queen of Heart           | 3 | 89    |
| Niedersachsen<br>Palmengarten<br>Frankfurt | 0 | 22.5  | Fantasia Mondiale           | 1 | 29.67 | Speelwark                | 3 | 42    |
| Paprika                                    | 0 | 20.6  | First Lady                  | 1 | 62.5  |                          |   |       |
| Pascaline                                  | 0 | 41    | Frisson Frais               | 1 | 5     |                          |   |       |

**Suppl. Table S3.** Distribution of allele dosage of KASP marker Rh\_PL\_SNP49K for petal length in the association panel of 95 cultivars.

| No. | Cultivar            | SNP dosage | Petal length (mm) | No. | Cultivar             | SNP dosage | Petal length (mm) |
|-----|---------------------|------------|-------------------|-----|----------------------|------------|-------------------|
| 1   | Parole              | 3          | 65.39             | 69  | Comtessa AL          | 1          | 50.91             |
| 2   | Queen Elisabeth     | 1          | 57.7              | 70  | Lipstick             | 0          | 25.05             |
| 3   | Schneewittchen      | 2          | 40.23             | 71  | Midsummer            | 0          | 47.66             |
| 4   | Nemo                | 0          | 24.99             | 72  | Arabia               | 1          | 46.26             |
| 5   | Super Star          | 2          | 52.56             | 73  | Hansestadt Rostock   | 1          | 48.72             |
| 6   | Small Maidens Blush | 0          | 34.01             | 74  | Kastelruther Spatzen | 0          | 30.61             |
| 10  | Chippendale         | 3          | 41.49             | 75  | Elfe                 | 2          | 68.2              |
| 12  | Blue Parfum         | 1          | 46.67             | 77  | Jazz                 | 0          | 33.87             |
| 13  | Feuerwerk           | 1          | 50.37             | 78  | Mainzer Fastnacht    | 1          | 53.85             |
| 14  | Gebrüder Grimm      | 1          | 42.51             | 79  | Dukat                | 1          | 52.85             |
| 15  | George Vancouver    | 1          | 34.73             | 80  | My Girl              | 2          | 50.06             |
| 16  | König Stanislaus    | 0          | 46.37             | 81  | Mariatheresia        | 0          | 34.99             |
| 17  | Heidi Klum          | 1          | 37.5              | 84  | Knockout             | 1          | 47.74             |
| 18  | Jasmina             | 0          | 33.21             | 85  | Berolina             | 1          | 67.7              |
| 20  | Sonnenschirm        | 2          | 36.23             | 89  | Westerland           | 1          | 60.73             |
| 24  | Heidetraum          | 0          | 29.67             | 92  | Frühlingsduft        | 1          | 54.47             |
| 26  | Nostalgie           | 2          | 38.88             | 93  | Sebastian Kneipp     | 0          | 52.8              |
| 27  | Sommerwind          | 0          | 34.3              | 94  | Lavender Lassie      | 3          | 37.24             |
| 28  | New Dawn            | 0          | 42.66             | 95  | Dortmund             | 1          | 56.55             |
| 32  | Mevrouw N. Nypels   | 0          | 42.23             | 96  | Friesia              | 4          | 53                |
| 35  | Mitsouko            | 1          | 54.69             | 97  | Sterntaler           | 1          | 47.1              |
| 36  | Black Baccara       | 2          | 45.16             | 99  | Raubritter           | 0          | 34.02             |
| 37  | Alinka              | 1          | 48.99             | 100 | Herkules             | 1          | 46.83             |
| 38  | Auslo               | 1          | 48.35             | 103 | Fritz Nobis          | 1          | 40.62             |
| 39  | Ausmas              | 1          | 58.18             | 104 | Beverly              | 0          | 55.74             |
| 40  | Shalom              | 1          | 46.16             | 105 | Juanita              | 0          | 21.61             |
| 41  | La Sevillana        | 0          | 36.57             | 110 | Windrose             | 2          | 42.5              |
| 42  | Mister Lincoln      | 2          | 64.12             | 111 | Donauprinzessin      | 0          | 37.21             |
| 43  | Rumba               | 0          | 22.95             | 112 | Münsterland          | 2          | 60.93             |

|    |                    |   |       |     |                     |   |       |
|----|--------------------|---|-------|-----|---------------------|---|-------|
| 44 | Arthur Bell        | 1 | 66.29 | 114 | Venice              | 0 | 34.93 |
| 46 | Comtesse de Segur  | 2 | 53.1  | 115 | Focus               | 1 | 57.16 |
| 47 | Mme Boll           | 1 | 46.84 | 116 | Simply              | 0 | 40.5  |
| 49 | Compassion         | 1 | 59.76 | 118 | Kronjuwel           | 1 | 33.85 |
| 50 | Sutters Gold       | 2 | 66.5  | 119 | Tornella            | 1 | 37.35 |
| 51 | Scarlet Meidiland  | 0 | 22.8  | 120 | Herzogin Friederike | 0 | 32.73 |
| 52 | Rose de Resht      | 0 | 32.43 | 122 | Blue River          | 1 | 51.8  |
| 53 | Celine Delbard     | 1 | 49.01 | 131 | Cute Haze           | 0 | 28.28 |
| 54 | Louise Odier       | 2 | 36.94 | 132 | Duftwolke           | 1 | 54.35 |
| 55 | Ausfather          | 1 | 52.38 | 133 | Goethe Rose         | 3 | 61.35 |
| 56 | Perpetually Yours  | 0 | 44.3  | 134 | Albrecht Dürer Rose | 2 | 41.5  |
| 57 | Mme Knorr          | 1 | 46.38 | 135 | Stadt Rom           | 0 | 29.77 |
| 58 | Papageno           | 0 | 46.77 | 136 | Bienenweide         | 0 | 24.93 |
| 59 | France Libre       | 3 | 50.69 | 137 | Lolita              | 2 | 54.54 |
| 61 | Princess Alexandra | 1 | 45.65 | 138 | Magenta             | 2 | 38.81 |
| 62 | Mrs John Laing     | 2 | 60.4  | 139 | Rose Gaujard        | 3 | 50.88 |
| 66 | Black Magic        | 2 | 50.82 | 140 | Crimson Glory       | 1 | 55.61 |
| 67 | China Girl         | 2 | 49.77 | 141 | Sunset Boulevard    | 3 | 57.08 |
| 68 | Perennial Blush    | 0 | 20.64 |     |                     |   |       |

**Suppl. Table S4.** Validation of KASP marker Rh\_PL\_SNP49K for petal length with 179 independent rose cultivars.

| Cultivar                | SNP dosage | Petal length (mm) | Cultivar                 | SNP dosage | Petal length |
|-------------------------|------------|-------------------|--------------------------|------------|--------------|
| Alden Biesen            | 0          | 17.6              | Arabia                   | 1          | 38.0         |
| Alpenglühén             | 0          | 20.8              | Artemis                  | 1          | 34.4         |
| Annelies                | 0          | 17.7              | Ascot                    | 1          | 47.0         |
| Apricot Clementine      | 0          | 23.3              | Ausrimini Strawberry     | 1          | 41.7         |
| Aspirin                 | 0          | 27.9              | Aya Renaissance          | 1          | 41.9         |
| Bad Birnbach            | 0          | 22.9              | Bienenweide, gelb        | 1          | 25.9         |
| Bad Wörishofen          | 0          | 23.1              | Bouquet Parfait          | 1          | 24.8         |
| Barkarole               | 0          | 53.0              | Brokat                   | 1          | 45.4         |
| Bel Esprit              | 0          | 23.5              | Bukava                   | 1          | 25.9         |
| Bienenweide, apricot    | 0          | 22.2              | Cap Diamant              | 1          | 35.9         |
| Bienenweide, rot        | 0          | 25.0              | Catherine Laborde        | 1          | 49.8         |
| Blühwunder              | 0          | 21.9              | Deep Impression          | 1          | 33.4         |
| Brigitte de Villenfagne | 0          | 16.3              | Dukat                    | 1          | 51.8         |
| Caesera                 | 0          | 37.0              | Elvis                    | 1          | 47.1         |
| Candy                   | 0          | 36.8              | Eskelund                 | 1          | 47.9         |
| Capricia                | 0          | 34.8              | Fairest Cape             | 1          | 39.4         |
| Cherry Lips             | 0          | 15.5              | Freisinger Morgenröte    | 1          | 45.0         |
| Cinderella              | 0          | 27.0              | Gartenspaß               | 1          | 33.0         |
| Diamant                 | 0          | 24.1              | Goldelse                 | 1          | 34.5         |
| Eifelzauber             | 0          | 42.2              | Golden Wings             | 1          | 42.3         |
| Escimo                  | 0          | 33.3              | Harlow Carr              | 1          | 34.9         |
| Fantasia Mondiale       | 0          | 45.3              | Heavenly Pink            | 1          | 12.6         |
| Felicita                | 0          | 32.1              | Juwena                   | 1          | 26.8         |
| Felicitas               | 0          | 25.7              | La Perla                 | 1          | 41.3         |
| Flash                   | 0          | 15.1              | Ladybird                 | 1          | 35.9         |
| Fortissima              | 0          | 18.9              | Lampion                  | 1          | 38.5         |
| Fortuna                 | 0          | 15.6              | Lions Rose               | 1          | 38.1         |
| Geisha                  | 0          | 30.7              | Mainaufeuer              | 1          | 28.4         |
| Giardina                | 0          | 41.4              | Maria Teresa             | 1          | 30.0         |
| Goldmarie               | 0          | 29.0              | Maxim                    | 1          | 52.3         |
| Goldschatz              | 0          | 27.2              | Mein schöner Garten      | 1          | 34.4         |
| Home and Garden         | 0          | 30.9              | Natalie Renaissance      | 1          | 47.9         |
| Internescori            | 0          | 40.3              | Ninetta                  | 1          | 27.2         |
| Jacqueline Humery       | 0          | 25.2              | Paprika                  | 1          | 35.8         |
| Jet Spray               | 0          | 12.0              | Parfume de Grasse        | 1          | 41.1         |
| Larissa                 | 0          | 22.8              | Purple Kiss              | 1          | 21.4         |
| Liebeszauber            | 0          | 45.3              | Rose de la Petite Chabot | 1          | 26.7         |



|                            |   |      |                             |   |      |
|----------------------------|---|------|-----------------------------|---|------|
| Maria Mathilda             | 0 | 30.5 | Rose von Oldenburg          | 1 | 28.3 |
| Marie-Luise Marjahn        | 0 | 42.4 | Rosengräfin Marie Henriette | 1 | 40.9 |
| Marvella                   | 0 | 36.9 | Rosenprofessor Sieber       | 1 | 31.1 |
| Matador                    | 0 | 25.7 | Roter Korsar                | 1 | 38.2 |
| Matchball                  | 0 | 21.4 | Sangerhausen                | 1 | 37.1 |
| Medeo                      | 0 | 15.9 | Souvenir de Baden Baden     | 1 | 44.7 |
| Melina                     | 0 | 34.3 | T10605 Maxim                | 1 | 52.3 |
| Mirato                     | 0 | 24.5 | Zaide                       | 1 | 44.4 |
| Mondial                    | 0 | 46.4 | Acapella                    | 2 | 62.0 |
| Moneta                     | 0 | 23.3 | Aphrodite                   | 2 | 62.7 |
| Mozart                     | 0 | 13.9 | Avec Amour                  | 2 | 57.5 |
| NDR3                       | 0 | 30.0 | Bassino                     | 2 | 16.5 |
| Palmengarten frankfurt     | 0 | 24.1 | Bernsteinrose               | 2 | 28.3 |
| Pastella                   | 0 | 27.7 | Cherry Girl                 | 2 | 27.7 |
| Perennial Blue             | 0 | 14.9 | Claus Dalby                 | 2 | 46.9 |
| Pink Bassino               | 0 | 25.6 | Domstadt Fulda              | 2 | 30.1 |
| Planten un Bloomen         | 0 | 26.5 | Feeling                     | 2 | 26.1 |
| Playful Rokoko             | 0 | 22.9 | Friedenslicht               | 2 | 36.4 |
| Pomponella                 | 0 | 29.2 | Garden of Roses             | 2 | 35.0 |
| Queen of Hearts            | 0 | 36.8 | Gentile Harmonie            | 2 | 45.8 |
| R. rugosa SchneeEule       | 0 | 45.1 | Golden Monica               | 2 | 38.2 |
| Racquel                    | 0 | 48.4 | Golden Silk                 | 2 | 51.6 |
| Red Haze                   | 0 | 33.5 | Helene de Gerlach           | 2 | 43.2 |
| Rody                       | 0 | 25.2 | Inka                        | 2 | 35.7 |
| Romanze                    | 0 | 38.1 | Kosmos                      | 2 | 34.1 |
| Rotilia                    | 0 | 26.5 | Kupferkönigin               | 2 | 45.8 |
| Sana Rose                  | 0 | 34.0 | Mme Bovary                  | 2 | 46.5 |
| Satina                     | 0 | 15.9 | Morning Sun                 | 2 | 29.3 |
| Scepter's isle             | 0 | 44.8 | Olympisches Feuer           | 2 | 25.0 |
| Shirley                    | 0 | 43.3 | Omi Oswald                  | 2 | 24.0 |
| Sirius                     | 0 | 39.8 | Piano                       | 2 | 30.7 |
| Sommerabend                | 0 | 20.6 | Postillon                   | 2 | 47.3 |
| Sonnenröschen              | 0 | 17.3 | Purple Lodge                | 2 | 38.9 |
| Soul                       | 0 | 43.4 | Rokoko                      | 2 | 44.6 |
| Souvenir                   | 0 | 29.1 | Romina                      | 2 | 60.0 |
| Stadt Rom                  | 0 | 28.8 | Schloß Ippenburg            | 2 | 50.9 |
| T06622                     | 0 | 39.4 | Shanty                      | 2 | 38.4 |
| The Mayflower              | 0 | 41.1 | Vanilla Cream               | 2 | 22.5 |
| Tornado                    | 0 | 31.5 | Voyage                      | 2 | 48.9 |
| Uetersener Klosterrose     | 0 | 47.1 | Amber Sun                   | 3 | 30.2 |
| Uetersener Rosenkönigin    | 0 | 33.3 | Candlelight                 | 3 | 42.2 |
| Uetersener Rosenprinzessin | 0 | 31.7 | Caramella                   | 3 | 37.7 |
| Walzertraum                | 0 | 46.9 | Gelber Engel                | 3 | 27.2 |
| Waterloo                   | 0 | 17.1 | Golden Medaillon            | 3 | 43.3 |
| White Chrystal             | 0 | 21.8 | Grande Amore                | 3 | 52.0 |
| White Haze                 | 0 | 36.1 | Lilly Marleen               | 3 | 35.7 |
| White Magic                | 0 | 20.5 | Meimelliac                  | 3 | 47.3 |
| Yellow Light               | 0 | 14.4 | Robusta                     | 3 | 36.5 |
| Zwergenfee                 | 0 | 22.6 | Rugelda                     | 3 | 37.4 |
| Alabaster                  | 1 | 29.7 | Schwarze Madonna            | 3 | 39.3 |
| Altera                     | 1 | 42.8 | Solero                      | 3 | 26.5 |
| Aperitif                   | 1 | 38.3 | Jubilé Imperial             | 4 | 38.4 |
| Aprikola                   | 1 | 30.5 |                             |   |      |

**Suppl. Table S5.** Distribution of allele dosage of KASP marker Rh\_FR\_SNP139K for fragrance in the association panel of 95 cultivars.

| No. | Cultivar             | SNP dosage | Scent | No. | Cultivar           | SNP dosage | Scent |
|-----|----------------------|------------|-------|-----|--------------------|------------|-------|
| 131 | Cute Haze            | 0          | 0.63  | 80  | My Girl            | 3          | 0.88  |
| 41  | La Sevillana         | 0          | 1.16  | 58  | Papageno           | 3          | 0.88  |
| 4   | Nemo                 | 0          | 0.21  | 2   | Queen Elizabeth    | 3          | 0.75  |
| 51  | Scarlet Meidiland    | 0          | 0.25  | 139 | Rose Gaujard       | 3          | 1.3   |
| 135 | Stadt Rom            | 0          | 0.3   | 3   | Schneewittchen     | 3          | 1.13  |
| 37  | Alinka               | 1          | 1     | 20  | Sonnenschirm       | 3          | 1.17  |
| 136 | Bienenweide          | 1          | 0.25  | 97  | Sterntaler         | 3          | 2.12  |
| 15  | George Vancouver     | 1          | 0.63  | 141 | Sunset Boulevard   | 3          | 0.75  |
| 24  | Heidetraum           | 1          | 0.88  | 5   | Superstar          | 3          | 1.15  |
| 18  | Jasmina              | 1          | 1.5   | 119 | Tornella           | 3          | 0.75  |
| 74  | Kastelruther Spatzen | 1          | 0.72  | 89  | Westerland         | 3          | 2.5   |
| 70  | Lipstick             | 1          | 1.34  | 110 | Windrose           | 3          | 1.04  |
| 116 | Simply               | 1          | 1.11  | 72  | Arabia             | 4          | 2     |
| 27  | Sommerwind           | 1          | 1.05  | 55  | Ausfather          | 4          | 2.75  |
| 36  | Black Baccara        | 2          | 0.25  | 38  | Auslo              | 4          | 3.25  |
| 66  | Black Magic          | 2          | 1.88  | 39  | Ausmas             | 4          | 1.69  |
| 46  | Comtesse de Segur    | 2          | 2.5   | 104 | Beverly            | 4          | 3     |
| 111 | Donauprinzessin      | 2          | 1.25  | 12  | Blue Parfum        | 4          | 3.5   |
| 59  | France Libre         | 2          | 0.5   | 122 | Blue River         | 4          | 3.5   |
| 14  | Gebrüder Grimm       | 2          | 1.25  | 49  | Compassion         | 4          | 3     |
| 73  | Hansestadt Rostock   | 2          | 0.75  | 69  | Comtessa AL        | 4          | 2.75  |
| 77  | Jazz                 | 2          | 1.25  | 140 | Crimson Glory      | 4          | 3     |
| 105 | Juanita              | 2          | 0.75  | 132 | Duftwolke          | 4          | 3.5   |
| 118 | Kronjuwel            | 2          | 1.06  | 96  | Friesia            | 4          | 2.63  |
| 81  | Mariathesia          | 2          | 1.23  | 103 | Fritz Nobis        | 4          | 3.25  |
| 32  | Mevrouw N. Nypels    | 2          | 1.03  | 92  | Frühlingsduft      | 4          | 2.5   |
| 71  | Midsummer            | 2          | 0.46  | 133 | Goethe Rose        | 4          | 3     |
| 28  | New Dawn             | 2          | 1.17  | 17  | Heidi Klum         | 4          | 2.38  |
| 26  | Nostalgie            | 2          | 0.82  | 100 | Herkules           | 4          | 3     |
| 99  | Raubritter           | 2          | 2.75  | 94  | Lavender Lassie    | 4          | 3.13  |
| 43  | Rumba                | 2          | 1.07  | 54  | Louise Odier       | 4          | 3     |
| 40  | Shalom               | 2          | 0.75  | 138 | Magenta            | 4          | 3.21  |
| 114 | Venice               | 2          | 1.09  | 78  | Mainzer Fastnacht  | 4          | 3.4   |
| 134 | A. Dürer Rose        | 3          | 1.75  | 42  | Mister Lincoln     | 4          | 2.63  |
| 44  | Arthur Bell          | 3          | 1.25  | 35  | Mitsouko           | 4          | 1.72  |
| 85  | Berolina             | 3          | 2     | 57  | Mme Knorr          | 4          | 2.75  |
| 53  | Celine Delbard       | 3          | 1     | 47  | Mme. Boll          | 4          | 2.92  |
| 67  | China Girl           | 3          | 1.25  | 62  | Mrs. John Laing    | 4          | 2.94  |
| 10  | Chippendale          | 3          | 2     | 112 | Münsterland        | 4          | 2.06  |
| 95  | Dortmund             | 3          | 0.5   | 1   | Parole             | 4          | 2.5   |
| 79  | Dukat                | 3          | 2.5   | 68  | Perennial Blush    | 4          | 3     |
| 75  | Elfe                 | 3          | 1     | 56  | Perpetually Yours  | 4          | 0.25  |
| 13  | Feuerwerk            | 3          | 1.5   | 61  | Princess Alexandra | 4          | 3.19  |
| 115 | Focus                | 3          | 1.63  | 52  | Rose de Resht      | 4          | 3.07  |
| 120 | Herzogin Friederike  | 3          | 0.5   | 93  | Sebastian Kneipp   | 4          | 2.75  |
| 84  | Knockout             | 3          | 0.96  | 6   | Small Maidens      | 4          | 2.75  |
| 16  | König Stanislaus     | 3          | 1.63  | 50  | Sutters Gold       | 4          | 3.5   |
| 137 | Lolita               | 3          | 2.38  |     |                    |            |       |

**Suppl. Table S6.** Validation of KASP marker Rh\_FR\_SNP139K with 222 independent rose cultivars

| Cultivar               | Scent | SNP dosage | Cultivar                 | Scent | SNP dosage | Cultivar                 | Scent | SNP dosage |
|------------------------|-------|------------|--------------------------|-------|------------|--------------------------|-------|------------|
| Satina                 | 1     | 0          | Bienenweide apricot      | 1     | 2          | Zaide                    | 1     | 4          |
| Rody                   | 1     | 0          | Apricot Clementine       | 1     | 2          | White Chrystal           | 2     | 4          |
| Red Haze               | 1     | 0          | Annelies                 | 1     | 2          | Vanilla Cream            | 1     | 4          |
| Purple Kiss            | 1     | 0          | Alden Biesen             | 1     | 2          | Souvenir de Rose Marie   | 1     | 4          |
| Pearl Mirato           | 1     | 0          | Unicef Rose              | 1     | 2          | Solero                   | 1     | 4          |
| Mirato                 | 1     | 0          | Giardina                 | 2     | 2          | Schoone Gezelle Blomme   | 1     | 4          |
| Medeo                  | 1     | 0          | Perennial Blue           | 3     | 2          | Sana Rose                | 1     | 4          |
| Fortuna                | 1     | 0          | Maxim                    | 3     | 2          | Rugelda                  | 1     | 4          |
| Centro-Rose            | 1     | 0          | Jour de Fetes            | 3     | 2          | Rosy Purple              | 1     | 4          |
| Amulett                | 1     | 0          | Walferdange              | 1     | 3          | Pretty Pink              | 1     | 4          |
| Alpenglhen            | 1     | 0          | Ueters. Rosenprinzessin  | 1     | 3          | Poesie                   | 1     | 4          |
| White Magic            | 1     | 1          | Ueters.Rosenknigin      | 1     | 3          | Omi Oswald               | 1     | 4          |
| White Haze             | 1     | 1          | Sunny Rose               | 1     | 3          | Neon                     | 1     | 4          |
| Sommersonne            | 1     | 1          | Sangerhausen             | 1     | 3          | NDR1 Radio               | 1     | 4          |
|                        |       |            | Jubilmsrose             |       |            | Niedersachsen            |       |            |
| Smile                  | 1     | 1          | Shanty                   | 1     | 3          | Matchball                | 1     | 4          |
| Roter Korsar           | 1     | 1          | Sonnenrschen            | 1     | 3          | Maaseik                  | 1     | 4          |
| Purple Haze            | 1     | 1          | Sahara                   | 1     | 3          | La Perla                 | 1     | 4          |
| Princ. J.-Charlotte    | 1     | 1          | Rosenfee                 | 1     | 3          | Juwena                   | 1     | 4          |
| Playful Rokoko         | 1     | 1          | Rose de la Petit Chabote | 1     | 3          | Helene de Gerlach        | 1     | 4          |
| Planten un Blomen      | 1     | 1          | Queen of Heart           | 1     | 3          | Golden Wings             | 1     | 4          |
| Pink Bassino           | 1     | 1          | Osiana                   | 1     | 3          | Gelber Engel             | 1     | 4          |
| Pastella               | 1     | 1          | Morning sun              | 1     | 3          | Fortissima               | 1     | 4          |
| Paprika                | 1     | 1          | Mein schner Garten      | 1     | 3          | Eliza                    | 1     | 4          |
| Palmengarten Frankfurt | 1     | 1          | Marville                 | 1     | 3          | Christel von der Post    | 1     | 4          |
| Ninetta                | 1     | 1          | Maria Teresa             | 1     | 3          | Caramella                | 1     | 4          |
| Neige d'Ete            | 1     | 1          | Maria Mathilda           | 1     | 3          | Bienenweide gelb         | 1     | 4          |
| Moneta                 | 1     | 1          | Lampion                  | 1     | 3          | Feeling                  | 1     | 4          |
| Matador                | 1     | 1          | Jaqueline Humery         | 1     | 3          | Yellow light             | 1     | 4          |
| Mainaufeuer            | 1     | 1          | Heavenly Pink            | 1     | 3          | White Roadrunner         | 2     | 4          |
| Magma                  | 1     | 1          | Goldschatz               | 1     | 3          | Waterloo                 | 2     | 4          |
| Home and Garden        | 1     | 1          | Golden Monica            | 1     | 3          | Verdi                    | 2     | 4          |
| History                | 1     | 1          | Friedenslicht            | 1     | 3          | Twins                    | 2     | 4          |
| Grande Amore           | 1     | 1          | First Lady               | 1     | 3          | Shirley                  | 2     | 4          |
| Goldmarie 82           | 1     | 1          | Felicitas                | 1     | 3          | Pascaline                | 2     | 4          |
| Fantasia Mondiale      | 1     | 1          | Escimo                   | 1     | 3          | Marie-Luise Marjan       | 2     | 4          |
| Dinky                  | 1     | 1          | Eifelzauber              | 1     | 3          | Golden Silk              | 2     | 4          |
| Cubana                 | 1     | 1          | Easy to cut              | 1     | 3          | Elvis                    | 3     | 4          |
| Cherry Lips            | 1     | 1          | Dornrschenschloss       | 1     | 3          | Duftzauber 84            | 2     | 4          |
|                        |       |            | Sababurg                 |       |            |                          |       |            |
| Bel Esprit             | 1     | 1          | Domstadt Fulda           | 1     | 3          | Claus Dalby              | 2     | 4          |
| Austriana              | 1     | 1          | Candela                  | 1     | 3          | Catherine Laborde        | 2     | 4          |
| Aspirin Rose           | 1     | 1          | Bouquet Parfait          | 1     | 3          | Caesera                  | 2     | 4          |
| Arifa                  | 1     | 1          | Avec Amour               | 1     | 3          | Brigitte de Villenfagne  | 2     | 4          |
| Kordes Brillant        | 1     | 1          | Aprikola                 | 1     | 3          | Bernstein-Rose           | 2     | 4          |
| Neue Revue             | 1     | 1          | Amber Sun                | 1     | 3          | Augusta Luise            | 3     | 4          |
| Romanze                | 2     | 1          | Goldesel                 | 1     | 3          | Frhlingsgold            | 2     | 4          |
| Zwergfee 09            | 1     | 2          | Kleopatra                | 1     | 3          | Knigin von Dnemark     | 2     | 4          |
| Vif Eclat              | 1     | 2          | Walzertraum              | 2     | 3          | Lady Like                | 2     | 4          |
| Tornado                | 1     | 2          | Voyage                   | 2     | 3          | Maiden's Blush           | 2     | 4          |
| T06622                 | 1     | 2          | Souvenir de Baden Baden  | 2     | 3          | Tapis Volant             | 2     | 4          |
| Sirius                 | 1     | 2          | Rosenstadt Freising      | 2     | 3          | The Pilgrims             | 2     | 4          |
| Silver River           | 1     | 2          | Petticoat                | 2     | 3          | The Mayflower            | 3     | 4          |
| Sibelis               | 1     | 2          | Parfum de Grasse         | 2     | 3          | Soul                     | 3     | 4          |
| Rosenprofessor Sieber  | 1     | 2          | Memoire                  | 2     | 3          | Shocking Blue            | 3     | 4          |
| Rose von Oldenburg     | 1     | 2          | Melina                   | 2     | 3          | Schlo Ippenburg         | 3     | 4          |
| Rebell                 | 1     | 2          | Marie Antoinette         | 2     | 3          | Scepter's Isle           | 3     | 4          |
| Puccini                | 1     | 2          | Liebeszauber             | 2     | 3          | Rosengrfin M. Henriette | 3     | 4          |
| Piano                  | 1     | 2          | La Paloma 85             | 2     | 3          | Racquel                  | 3     | 4          |

|                  |   |   |                        |   |   |                           |   |   |
|------------------|---|---|------------------------|---|---|---------------------------|---|---|
| Paganini         | 1 | 2 | Kupferkönigin          | 2 | 3 | Purple Lodge              | 3 | 4 |
| Mariandel        | 1 | 2 | Inka                   | 2 | 3 | Pink Roadrunner           | 3 | 4 |
| Lilly Marleen    | 1 | 2 | Grete Schichedanz      | 2 | 3 | Nat. Renaissance          | 3 | 4 |
| Ladybird         | 1 | 2 | Emil Nolde Rose        | 2 | 3 | Meimelliac                | 3 | 4 |
| Kahlua           | 1 | 2 | Candlelight            | 2 | 3 | Madame Bovary             | 3 | 4 |
| Jugenliebe       | 1 | 2 | Canary                 | 2 | 3 | Internescori              | 3 | 4 |
| Jet Spray        | 1 | 2 | Aya Renaissance        | 2 | 3 | Harlow Carr               | 3 | 4 |
| Helmut Kohl Rose | 1 | 2 | Ascot                  | 2 | 3 | Gentile Harmonie          | 3 | 4 |
| Gartenspaß       | 1 | 2 | Aperitif               | 2 | 3 | Felicita                  | 3 | 4 |
| Frisson Frais    | 1 | 2 | Dukat                  | 2 | 3 | Eskelund                  | 3 | 4 |
| Francoise Drion  | 1 | 2 | Esmeralda              | 2 | 3 | Duftrausch                | 3 | 4 |
| Fairest Cape     | 1 | 2 | Freisinger Morgenröte  | 2 | 3 | Capricia                  | 3 | 4 |
| Diamant Rose     | 1 | 2 | Lapponia               | 2 | 3 | Cap Diamant               | 3 | 4 |
| Deep Impression  | 1 | 2 | Uetersener Klosterrose | 3 | 3 | Biedermeier Garden        | 3 | 4 |
| Claire Jolly     | 1 | 2 | Marc Chagall           | 3 | 3 | Astrid Grf. v. Hardenberg | 3 | 4 |
| Cherry Girl      | 1 | 2 | Artemis                | 3 | 3 | Alterra                   | 3 | 4 |
| Black Magic      | 1 | 2 | Aphrodite              | 3 | 3 | Acapella                  | 3 | 4 |

**Suppl. Table S7.** Distribution of allele dosage of KASP marker Rh\_FR\_SNP201K for fragrance in the association panel of 95 cultivars.

| No. | Cultivar           | SNP Dosage | Scent | No. | Cultivar             | SNP Dosage | Scent |
|-----|--------------------|------------|-------|-----|----------------------|------------|-------|
| 6   | Small Maidens      | 0          | 2.75  | 46  | Comtesse de Segur    | 2          | 2.5   |
| 12  | Blue Parfum        | 0          | 3.5   | 54  | Louise Odier         | 2          | 3     |
| 17  | Heidi Klum         | 0          | 2.38  | 55  | Ausfather            | 2          | 2.75  |
| 49  | Compassion         | 0          | 3     | 58  | Papageno             | 2          | 0.88  |
| 61  | Princess Alexandra | 0          | 3.19  | 67  | China Girl           | 2          | 1.25  |
| 68  | Perennial Blush    | 0          | 3     | 72  | Arabia               | 2          | 2     |
| 78  | Mainzer Fastnacht  | 0          | 3.4   | 73  | Hansestadt Rostock   | 2          | 0.75  |
| 96  | Friesia            | 0          | 2.63  | 74  | Kastelruther Spatzen | 2          | 0.72  |
| 100 | Herkules           | 0          | 3     | 77  | Jazz                 | 2          | 1.25  |
| 122 | Blue River         | 0          | 3.5   | 89  | Westerland           | 2          | 2.5   |
| 138 | Magenta            | 0          | 3.21  | 92  | Frühlingsduft        | 2          | 2.5   |
| 10  | Chippendale        | 1          | 2     | 95  | Dortmund             | 2          | 0.5   |
| 13  | Feuerwerk          | 1          | 1.5   | 97  | Sterntaler           | 2          | 2.12  |
| 14  | Gebrüder Grimm     | 1          | 1.25  | 103 | Fritz Nobis          | 2          | 3.25  |
| 18  | Jasmina            | 1          | 1.5   | 105 | Juanita              | 2          | 0.75  |
| 20  | Sonnenschirm       | 1          | 1.17  | 111 | Donauprinzessin      | 2          | 1.25  |
| 26  | Nostalgie          | 1          | 0.82  | 118 | Kronjuwel            | 2          | 1.06  |
| 27  | Sommerwind         | 1          | 1.05  | 119 | Tornella             | 2          | 0.75  |
| 28  | New Dawn           | 1          | 1.17  | 120 | Herzogin Friederike  | 2          | 0.5   |
| 36  | Black Baccara      | 1          | 0.25  | 135 | Stadt Rom            | 2          | 0.3   |
| 40  | Shalom             | 1          | 0.75  | 136 | Bienenweide          | 2          | 0.25  |
| 47  | Mme. Boll          | 1          | 2.92  | 139 | Rose Gaujard         | 2          | 1.3   |
| 52  | Rose de Resht      | 1          | 3.07  | 140 | Crimson Glory        | 2          | 3     |
| 56  | Perpetually Yours  | 1          | 0.25  | 2   | Queen Elizabeth      | 3          | 0.75  |
| 57  | Mme Knorr          | 1          | 2.75  | 3   | Schneewittchen       | 3          | 1.13  |
| 62  | Mrs. John Laing    | 1          | 2.94  | 15  | George Vancouver     | 3          | 0.63  |
| 66  | Black Magic        | 1          | 1.88  | 16  | König Stanislaus     | 3          | 1.63  |
| 69  | Comtessa AL        | 1          | 2.75  | 24  | Heidetraum           | 3          | 0.88  |
| 70  | Lipstick           | 1          | 1.34  | 35  | Mitsouko             | 3          | 1.72  |
| 75  | Elfe               | 1          | 1     | 37  | Alinka               | 3          | 1     |
| 79  | Dukat              | 1          | 2.5   | 42  | Mister Lincoln       | 3          | 2.63  |
| 80  | My Girl            | 1          | 0.88  | 44  | Arthur Bell          | 3          | 1.25  |
| 84  | Knockout           | 1          | 0.96  | 50  | Sutters Gold         | 3          | 3.5   |
| 93  | Sebastian Kneipp   | 1          | 2.75  | 51  | Scarlet Meidiland    | 3          | 0.25  |
| 99  | Raubritter         | 1          | 2.75  | 53  | Celine Delbard       | 3          | 1     |
| 104 | Beverly            | 1          | 3     | 59  | France Libre         | 3          | 0.5   |
| 112 | Münsterland        | 1          | 2.06  | 71  | Midsummer            | 3          | 0.46  |
| 132 | Duftwolke          | 1          | 3.5   | 81  | Mariatheresia        | 3          | 1.23  |

|     |                     |   |      |     |                      |   |      |
|-----|---------------------|---|------|-----|----------------------|---|------|
| 133 | Goethe Rose         | 1 | 3    | 85  | Berolina             | 3 | 2    |
| 134 | Albrecht Dürer Rose | 1 | 1.75 | 94  | Lavender Lassie      | 3 | 3.13 |
| 137 | Lolita              | 1 | 2.38 | 110 | Windrose             | 3 | 1.04 |
| 141 | Sunset Boulevard    | 1 | 0.75 | 114 | Venice               | 3 | 1.09 |
| 1   | Parole              | 2 | 2.5  | 115 | Focus                | 3 | 1.63 |
| 5   | Superstar           | 2 | 1.15 | 116 | Simply               | 3 | 1.11 |
| 38  | Auslo               | 2 | 3.25 | 4   | Nemo                 | 4 | 0.21 |
| 39  | Ausmas              | 2 | 1.69 | 32  | Mevrouv Nath. Nypels | 4 | 1.03 |
| 41  | La Sevillana        | 2 | 1.16 | 131 | Cute Haze            | 4 | 0.63 |
| 43  | Rumba               | 2 | 1.07 |     |                      |   |      |

**Suppl. Table S8.** Validation of KASP marker Rh\_FR\_SNP201K with 282 independent rose cultivars.

| Cultivar              | Scent | SNP dosage | Cultivar                   | Scent | SNP dosage | Cultivar                  | Scent | SNP dosage |
|-----------------------|-------|------------|----------------------------|-------|------------|---------------------------|-------|------------|
| Annelies              | 1     | 0          | Sahara                     | 1     | 1          | Palmengarten Frankfurt    | 1     | 2          |
| Artemis               | 3     | 0          | Sangerhausen Jubiläumsrose | 1     | 1          | Paprika                   | 1     | 2          |
| Astrid von Hardenberg | 3     | 0          | Solero                     | 1     | 1          | Poesie                    | 1     | 2          |
| Bernstein-Rose        | 2     | 0          | Sommerabend                | 1     | 1          | Postillion                | 2     | 2          |
| CF Meyer              | 3     | 0          | Souvenir de Rose Marie     | 1     | 1          | Pretty Pink               | 1     | 2          |
| Claire Jolly          | 1     | 0          | Sunny Sky                  | 2     | 1          | Red Flame                 | 3     | 2          |
| Diamant               | 1     | 0          | The Mayflower              | 3     | 1          | Romantic Roadrunner       | 2     | 2          |
| Dinky                 | 1     | 0          | Tradition 95               | 1     | 1          | Rosarium Uetersen         | 1     | 2          |
| Easy to cut           | 1     | 0          | Twins                      | 2     | 1          | Rose von Oldenburg        | 1     | 2          |
| Fils des Saison       | 1     | 0          | Valencia                   | 2     | 1          | Rosenfee                  | 1     | 2          |
| First Lady            | 1     | 0          | Vodacom                    | 1     | 1          | Rosy Purple               | 1     | 2          |
| Flash                 | 1     | 0          | Voyage                     | 2     | 1          | Rotilia                   | 1     | 2          |
| Fortissima            | 1     | 0          | Dame de Coeur              | 1     | 1          | Shanty                    | 1     | 2          |
| Frisson Frais         | 1     | 0          | Acapella                   | 3     | 2          | Shirley                   | 2     | 2          |
| Garden of Roses       | 3     | 0          | Alden Biesen               | 1     | 2          | Sibelius                  | 1     | 2          |
| Goldener Olymp        | 2     | 0          | Aloha                      | 1     | 2          | Silver River              | 1     | 2          |
| La Perla              | 1     | 0          | Amber Sun                  | 1     | 2          | Sirius                    | 1     | 2          |
| Lupo                  | 1     | 0          | Amulett                    | 1     | 2          | Smile                     | 1     | 2          |
| Medeo                 | 1     | 0          | Apache                     | 1     | 2          | Souvenir de Baden Baden   | 2     | 2          |
| Memoire               | 2     | 0          | Aphrodite                  | 3     | 2          | Speelwark                 | 2     | 2          |
| Mossue de 4 saisons   | 3     | 0          | Ascot                      | 2     | 2          | Summer Memories           | 1     | 2          |
| Ms Doreen Pike        | 2     | 0          | Aspirin                    | 1     | 2          | Sunny Rose                | 1     | 2          |
| Paloma                | 2     | 0          | Ausrimini                  | 3     | 2          | T06622                    | 1     | 2          |
| Pascaline             | 2     | 0          | Bad Birnbach               | 1     | 2          | The Pilgrims              | 2     | 2          |
| Perennial Blue        | 3     | 0          | Barock                     | 2     | 2          | Uetersener Klosterrose    | 3     | 2          |
| Puccini               | 1     | 0          | Bassino                    | 1     | 2          | Uetersen. Rosenprinzessin | 1     | 2          |
| Pur Roadrunner        | 3     | 0          | Bel Esprit                 | 1     | 2          | Vanilla Cream             | 1     | 2          |
| Purple Lodge          | 3     | 0          | Belvedere                  | 1     | 2          | Verdi                     | 2     | 2          |
| Romanze               | 2     | 0          | Biedermeier Garden         | 3     | 2          | Vif Eclat                 | 1     | 2          |
| Rosa rugosa Foxi      | 3     | 0          | Bouquet Parfait            | 1     | 2          | Walferdange               | 1     | 2          |
| R. rugosa Schneeeule  | 3     | 0          | Brichet                    | 2     | 2          | Walzertraum               | 2     | 2          |
| Rosanna               | 1     | 0          | Brigitte de Villenfagne    | 2     | 2          | Wavria                    | 1     | 2          |
| Rosenstadt Freising   | 2     | 0          | Caesera                    | 2     | 2          | White Haze                | 1     | 2          |
| Scepter's Isle        | 3     | 0          | Camelot                    | 2     | 2          | Zaide                     | 1     | 2          |
| Schoone Gezelle       | 1     | 0          | Canary                     | 2     | 2          | Antike 89                 | 2     | 3          |
| Blomme                |       |            |                            |       |            |                           |       |            |
| Waterloo              | 2     | 0          | Candela                    | 1     | 2          | Aperitif                  | 2     | 3          |
| White Chrystal        | 2     | 0          | Cap Diamant                | 3     | 2          | Bad Wörishofen 2005       | 1     | 3          |
| White Roadrunner      | 2     | 0          | Capricia                   | 3     | 2          | Bienenweide gelb          | 1     | 3          |
| Yellow light          | 2     | 0          | Centro-Rose                | 1     | 2          | Big Purple                | 2     | 3          |
| Alabaster             | 1     | 1          | Claus Dalby                | 2     | 2          | Caramella                 | 1     | 3          |
| Alpenglühén           | 1     | 1          | Cubana                     | 1     | 2          | Cherry Lips               | 1     | 3          |
| Alterra               | 3     | 1          | Diamant Rose               | 1     | 2          | Deep Impression           | 1     | 3          |
| Amadeus               | 1     | 1          | Dublin Bay                 | 1     | 2          | Dornröschenschloss        | 1     | 3          |
|                       |       |            |                            |       |            | Sababurg                  |       |            |
| Aprikola              | 1     | 1          | Duftrausch                 | 3     | 2          | Elmshorn                  | 1     | 3          |
| Augusta Luise         | 3     | 1          | Duftzauber 84              | 2     | 2          | Fantasia Mondiale         | 1     | 3          |

|                             |   |   |                             |   |   |                            |   |   |
|-----------------------------|---|---|-----------------------------|---|---|----------------------------|---|---|
| Austriana                   | 1 | 1 | Eifelzauber                 | 1 | 2 | Giardina                   | 2 | 3 |
| Avec Amour                  | 1 | 1 | Elvis                       | 3 | 2 | Golden Silk                | 2 | 3 |
| Aya Renaissance             | 2 | 1 | Emil Nolde Rose             | 2 | 2 | Goldmarie                  | 1 | 3 |
| Bienenweide apricot         | 1 | 1 | Eskelund                    | 3 | 2 | Gräfin Sonja               | 1 | 3 |
| Blühwunder 08               | 1 | 1 | Fairest Cape                | 1 | 2 | Grande Amore               | 1 | 3 |
| Bremer Stadtmusikant        | 2 | 1 | Felicita                    | 3 | 2 | Helga                      | 1 | 3 |
| Candleligh                  | 2 | 1 | Felicitas                   | 1 | 2 | Home + Garden              | 1 | 3 |
| Catherine Laborde           | 2 | 1 | Francoise Drion             | 1 | 2 | Jaqueline Humery           | 1 | 3 |
| Cherry Girl                 | 1 | 1 | Friedenslicht               | 1 | 2 | Jour de Fetes              | 3 | 3 |
| Christel von der Post       | 1 | 1 | Geisha                      | 1 | 2 | Jugenliebe                 | 1 | 3 |
| Cinderella                  | 1 | 1 | Gelber Engel                | 1 | 2 | Lilly Marleen              | 1 | 3 |
| Delicia                     | 2 | 1 | Gentile Harmonie            | 3 | 2 | Lions Rose                 | 2 | 3 |
| Eliza                       | 1 | 1 | Golden Gate                 | 2 | 2 | Mariandel                  | 1 | 3 |
| Escimo                      | 1 | 1 | Golden Medaillon            | 2 | 2 | Marie-Luise Marjan         | 2 | 3 |
| Feeling                     | 1 | 1 | Golden Wings                | 1 | 2 | Meimelliac                 | 3 | 3 |
| Gartenspaß                  | 1 | 1 | Goldelse                    | 1 | 2 | Mirato                     | 1 | 3 |
| Golden Monica               | 1 | 1 | Hans Gönewein Rose          | 1 | 2 | Mondial                    | 1 | 3 |
| Golden Tower                | 2 | 1 | Hansaland                   | 1 | 2 | Moonlight                  | 2 | 3 |
| Goldschatz                  | 1 | 1 | Harlekin                    | 1 | 2 | Pearl Mirato               | 1 | 3 |
| Grete Schichedanz           | 2 | 1 | Harlow Carr                 | 3 | 2 | Princ. Josephine-Charlotte | 1 | 3 |
| Heavenly Pink               | 1 | 1 | Helmut Kohl Rose            | 1 | 2 | Purple Kiss                | 1 | 3 |
| Helene de Gerlach           | 1 | 1 | Inka                        | 2 | 2 | Racquel                    | 3 | 3 |
| Hella                       | 1 | 1 | Internescori                | 3 | 2 | Rodeo                      | 1 | 3 |
| Kahlua                      | 1 | 1 | Jet Spray                   | 1 | 2 | Rosario                    | 1 | 3 |
| Kupferkönigin               | 2 | 1 | Juwena                      | 1 | 2 | Roter Korsar               | 1 | 3 |
| Ladybird                    | 1 | 1 | Karl Ploberger              | 1 | 2 | Rugelda                    | 1 | 3 |
| Magma                       | 1 | 1 | Laguna                      | 2 | 2 | Sana Rose                  | 1 | 3 |
| Manita                      | 1 | 1 | Lampion                     | 1 | 2 | Schloß Ippenburg           | 3 | 3 |
| Maria Mathilda              | 1 | 1 | Liebeszauber                | 2 | 2 | Schöne Berlinerin          | 2 | 3 |
| Maria Teresa                | 1 | 1 | Maaseik                     | 1 | 2 | Schwarze Madonna           | 1 | 3 |
| Marie Antoinette            | 2 | 1 | Madame Bovary               | 3 | 2 | Sommersonne                | 1 | 3 |
| Matador                     | 1 | 1 | Mainaufeuer                 | 1 | 2 | Sonnenröschen              | 1 | 3 |
| Melina                      | 2 | 1 | Marc Chagall                | 3 | 2 | Soul                       | 3 | 3 |
| Mon Petit Chou              | 2 | 1 | Marvelle                    | 1 | 2 | Vogelpark Walsrode         | 1 | 3 |
| Ninetta                     | 1 | 1 | Matchball                   | 1 | 2 | White Magic                | 1 | 3 |
| Parfume de Grasse           | 2 | 1 | Maxim                       | 3 | 2 | Zwergfee 09                | 1 | 3 |
| Pashmina                    | 1 | 1 | Meidomonac                  | 1 | 2 | Anda                       | 1 | 4 |
| Petticoat                   | 2 | 1 | Mein schöner Garten         | 1 | 2 | Apricot Clementine         | 1 | 4 |
| Piano                       | 1 | 1 | Moneta                      | 1 | 2 | Bukavu Lenbrirus           | 1 | 4 |
| Pink Roadrunner             | 3 | 1 | Morning Sun                 | 1 | 2 | Domstadt Fulda             | 1 | 4 |
| Planten un Blumen           | 1 | 1 | Mozart                      | 1 | 2 | Fortuna                    | 1 | 4 |
| Purple Haze                 | 1 | 1 | Natalie Renaissance         | 3 | 2 | History                    | 1 | 4 |
| Rebell                      | 1 | 1 | NDR1 Radio<br>Niedersachsen | 1 | 2 | Pastella                   | 1 | 4 |
| Red Haze                    | 1 | 1 | Neige d'Ete                 | 1 | 2 | Pink Bassino               | 1 | 4 |
| Rody                        | 1 | 1 | Neon                        | 1 | 2 | Playful Rokoko             | 1 | 4 |
| Romina                      | 3 | 1 | Olympisches Feuer 92        | 1 | 2 | Pomponella                 | 1 | 4 |
| Rose de la Petit<br>Chabote | 1 | 1 | Omi Oswald                  | 1 | 2 | Rosenprofessor Sieber      | 1 | 4 |
| Rose de la Pierette         | 2 | 1 | Osiana                      | 1 | 2 | Satina                     | 1 | 4 |
| Rotkäppchen                 | 1 | 1 | Paganini                    | 1 | 2 | Tornado                    | 1 | 4 |

**Suppl. Table S9.** Significant SNPs associated with petal number in roses.

| SNP-marker  | Chr | Position<br>(Mbp) | p-value  | Effects <sup>1)</sup><br>(Box Cox) |       |      | Effects<br>(nontransformed) |        |       | MAF     | F           | errordf | markerR2 | Genetic Var | Residual Var | -2LnLikelihood |
|-------------|-----|-------------------|----------|------------------------------------|-------|------|-----------------------------|--------|-------|---------|-------------|---------|----------|-------------|--------------|----------------|
|             |     |                   |          | AA                                 | AB    | BB   | AA                          | AB     | BB    |         |             |         |          |             |              |                |
| Rh_PN_SNP1  | 0   | 0.5               | 9.48E-22 | 0                                  | 1.23  | -    | 0                           | 6.93   | -     | 0.43421 | 189.89270   | 72      | 0.00205  | 1.28508     | 1.29E-05     | 263.39344      |
| Rh_PN_SNP2  | 0   | 25.4              | 1.22E-06 | 0                                  | -1.05 | -    | 0                           | 2.04   | -     | 0.40196 | 30.95576    | 48      | 0.27027  | 1.24473     | 0.03613      | 165.78737      |
| Rh_PN_SNP3  | 0   | 31.1              | 9.94E-18 | 0                                  | 1.45  | -    | 0                           | 13.36  | -     | 0.30159 | 150.07603   | 59      | 0.00204  | 1.61734     | 1.62E-05     | 227.52784      |
| Rh_PN_SNP4  | 1   | 13.9              | 3.45E-49 | 0.35                               | 0     | -    | 5.75                        | 0      | -     | 0.26812 | 1883.65696  | 65      | 0.38356  | 1.18941     | 1.19E-05     | 231.70061      |
| Rh_PN_SNP5  | 1   | 26.6              | 1.69E-06 | 0.45                               | 0     | -    | 9.91                        | 0      | -     | 0.11765 | 27.52006    | 64      | 0.28266  | 1.62062     | 0.00737      | 243.24663      |
| Rh_PN_SNP6  | 1   | 53.2              | 9.21E-07 | -1.04                              | 0     | -    | -22.2                       | 0      | -     | 0.25789 | 27.78847    | 91      | 0.20940  | 1.30022     | 0.07861      | 325.57573      |
| Rh_PN_SNP7  | 2   | 0.7               | 6.08E-49 | 0.53                               | 0     | -    | 5.06                        | 0      | -     | 0.375   | 2296.39532  | 60      | 0.25416  | 1.38046     | 1.38E-05     | 223.28086      |
| Rh_PN_SNP8  | 2   | 14.5              | 2.09E-07 | -                                  | 0     | 1.05 | -                           | 0      | 6.35  | 0.68217 | 31.92032    | 86      | 0.24129  | 1.53180     | 0.04896      | 318.25510      |
| Rh_PN_SNP9  | 2   | 15.4              | 2.03E-56 | 0                                  | -0.35 | -    | 0                           | -2.93  | -     | 0.30769 | 2223.44512  | 74      | 0.49884  | 1.31386     | 1.31E-05     | 273.07098      |
| Rh_PN_SNP10 | 2   | 32                | 4.76E-43 | -0.42                              | -0.35 | 0    | -15.62                      | -13.63 | 0     | 0.32110 | 1139.23189  | 52      | 0.62001  | 1.59100     | 1.59E-05     | 199.91830      |
| Rh_PN_SNP11 | 2   | 63.5              | 3.24E-09 | -                                  | -1.4  | 0    | -                           | -28.9  | 0     | 0.55118 | 46.87350    | 66      | 0.00121  | 1.44613     | 1.45E-05     | 249.13878      |
| Rh_PN_SNP12 | 2   | 72.9              | 4.47E-55 | 0                                  | -0.53 | -    | 0                           | -5.25  | -     | 0.16667 | 2037.05951  | 74      | 0.27212  | 1.67231     | 1.67E-05     | 289.92615      |
| Rh_PN_SNP13 | 3   | 4.2               | 8.85E-07 | -                                  | -1.1  | 0    | -                           | -8.22  | 0     | 0.51923 | 28.65996    | 77      | 0.21471  | 1.31621     | 0.04304      | 274.84683      |
| Rh_PN_SNP14 | 3   | 4.3               | 7.49E-14 | 0                                  | -1.22 | -    | 0                           | -6.09  | -     | 0.43182 | 124.47396   | 41      | 0.00166  | 1.59122     | 1.59E-05     | 155.42742      |
| Rh_PN_SNP15 | 3   | 7.7               | 2.03E-11 | 0                                  | -1.23 | -    | 0                           | -7.45  | -     | 0.37838 | 63.94858    | 70      | 0.28086  | 1.56024     | 0.00817      | 265.33796      |
| Rh_PN_SNP16 | 3   | 12.4              | 2.80E-08 | 0                                  | 0.4   | 1.5  | 0                           | 12.13  | 29.48 | 0.47445 | 22.80167    | 68      | 0.35618  | 1.53132     | 0.01422      | 261.16380      |
| Rh_PN_SNP17 | 3   | 33.2              | 1.67E-06 | 4.31                               | 2.35  | 0    | 58.16                       | 20.32  | 0     | 0.48980 | 16.09709    | 73      | 0.22308  | 0.19757     | 1.36721      | 243.56026      |
| Rh_PN_SNP18 | 3   | 38.6              | 1.43E-06 | 0                                  | 2.43  | 4.26 | 0                           | 23.16  | 58.48 | 0.45283 | 16.10501    | 78      | 0.24249  | 0.31944     | 1.40862      | 272.47126      |
| Rh_PN_SNP19 | 3   | 39.5              | 1.27E-10 | 0                                  | -1.16 | -    | 0                           | -12.08 | -     | 0.42553 | 70.65561    | 44      | 0.56265  | 1.19252     | 0.01105      | 153.12126      |
| Rh_PN_SNP20 | 3   | 41.1              | 2.17E-08 | 1.06                               | 0     | -    | 7.08                        | 0      | -     | 0.37791 | 38.32138    | 82      | 0.27135  | 1.50732     | 0.03771      | 304.72587      |
| Rh_PN_SNP21 | 3   | 42                | 4.32E-08 | -                                  | -1.06 | 0    | -                           | -10.41 | 0     | 0.58553 | 36.21930    | 86      | 0.25500  | 1.31799     | 0.04159      | 308.94159      |
| Rh_PN_SNP22 | 3   | 42.3              | 2.67E-57 | -0.36                              | 0     | -    | -5.47                       | 0      | -     | 0.27703 | 2636.59510  | 71      | 0.63493  | 1.41515     | 1.42E-05     | 265.29582      |
| Rh_PN_SNP23 | 3   | 42.5              | 6.87E-97 | 0                                  | 0.1   | 1.23 | 0                           | -4.89  | 13.46 | 0.49342 | 12856.12493 | 77      | 0.54354  | 1.67237     | 1.67E-05     | 296.22960      |
| Rh_PN_SNP24 | 4   | 30                | 1.72E-08 | 1.13                               | 0     | -    | 14.02                       | 0      | -     | 0.21324 | 41.56574    | 65      | 0.31630  | 1.53222     | 0.03137      | 241.13634      |
| Rh_PN_SNP25 | 4   | 30.4              | 2.40E-45 | -                                  | 0     | 0.35 | -                           | 0      | 4.57  | 0.65116 | 2301.54481  | 54      | 0.59213  | 1.50369     | 1.50E-05     | 204.30888      |
| Rh_PN_SNP26 | 4   | 53.9              | 1.54E-06 | -                                  | -0.44 | 0    | -                           | -20.11 | 0     | 0.55224 | 27.66080    | 70      | 0.26437  | 1.46749     | 0.00732      | 260.56948      |
| Rh_PN_SNP27 | 4   | 58                | 4.05E-60 | -                                  | 0.53  | 0    | -                           | 7.5    | 0     | 0.57857 | 2447.89721  | 78      | 0.28585  | 1.46017     | 1.46E-05     | 295.51415      |
| Rh_PN_SNP28 | 5   | 9                 | 7.82E-07 | -                                  | -1.41 | 0    | -                           | -35.42 | 0     | 0.52727 | 31.34386    | 54      | 0.29835  | 1.49740     | 0.01178      | 206.22392      |
| Rh_PN_SNP29 | 5   | 11                | 3.20E-80 | -                                  | -1.13 | 0    | -                           | -14.74 | 0     | 0.63725 | 24773.42944 | 61      | 0.54149  | 1.72879     | 1.73E-05     | 234.10257      |
| Rh_PN_SNP30 | 5   | 18.7              | 1.18E-08 | -                                  | 1.08  | 0    | -                           | 11.6   | 0     | 0.83486 | 39.69028    | 88      | 0.26048  | 1.46150     | 0.03326      | 328.23132      |
| Rh_PN_SNP31 | 5   | 31                | 9.31E-07 | -                                  | 0     | 1.01 | -                           | 0      | 7.54  | 0.55862 | 28.45850    | 78      | 0.22743  | 1.34831     | 0.04858      | 278.03087      |
| Rh_PN_SNP32 | 5   | 55.9              | 4.71E-49 | -                                  | -0.35 | 0    | -                           | 0.75   | 0     | 0.67368 | 2316.95159  | 60      | 0.62012  | 1.56720     | 1.57E-05     | 230.42282      |
| Rh_PN_SNP33 | 5   | 59.1              | 1.57E-06 | -                                  | 0.43  | 0    | -                           | 7.11   | 0     | 0.77528 | 27.92922    | 66      | 0.28246  | 1.26406     | 0.00701      | 234.87151      |
| Rh_PN_SNP34 | 5   | 63.6              | 5.50E-13 | -0.54                              | -1.16 | 0    | -8.83                       | -20.19 | 0     | 0.47328 | 45.68145    | 64      | 0.53595  | 1.38478     | 0.00822      | 234.87561      |
| Rh_PN_SNP35 | 5   | 67.3              | 6.37E-50 | -                                  | 0     | 0.35 | -                           | 0      | 9.5   | 0.74118 | 2367.83933  | 61      | 0.61766  | 1.52751     | 1.53E-05     | 231.06069      |

|             |   |      |          |       |       |       |       |       |       |         |             |    |         |         |          |           |
|-------------|---|------|----------|-------|-------|-------|-------|-------|-------|---------|-------------|----|---------|---------|----------|-----------|
| Rh_PN_SNP36 | 5 | 77   | 1.10E-09 | 0     | -1.12 | -     | 0     | -9.02 | -     | 0.34783 | 50.66532    | 65 | 0.36522 | 1.63115 | 0.03000  | 241.15639 |
| Rh_PN_SNP37 | 6 | 1.5  | 3.20E-53 | -0.35 | 0     | -     | -4.81 | 0     | -     | 0.22917 | 2240.03698  | 68 | 0.60516 | 1.58643 | 1.59E-05 | 261.93451 |
| Rh_PN_SNP38 | 6 | 13.6 | 6.27E-52 | 0     | 0.35  | -     | 0     | 8.22  | -     | 0.21429 | 2213.26467  | 66 | 0.61478 | 1.63123 | 1.63E-05 | 256.31370 |
| Rh_PN_SNP39 | 6 | 19.2 | 2.48E-08 | 0     | -1.15 | -     | 0     | 1.39  | -     | 0.44521 | 39.74650    | 69 | 0.32034 | 1.68738 | 0.03860  | 256.57150 |
| Rh_PN_SNP40 | 6 | 52   | 7.32E-07 | 1.22  | 0     | -     | 33.64 | 0     | -     | 0.26119 | 30.26814    | 64 | 0.30149 | 1.26677 | 0.04246  | 227.56310 |
| Rh_PN_SNP41 | 6 | 57   | 2.15E-06 | -     | 1.02  | 0     | -     | 16    | 0     | 0.73846 | 25.70391    | 92 | 0.19534 | 1.33354 | 0.07658  | 329.46576 |
| Rh_PN_SNP42 | 6 | 58.2 | 4.44E-60 | -     | -0.35 | 0     | -     | -9.51 | 0     | 0.57554 | 2618.45852  | 76 | 0.63706 | 1.42926 | 1.43E-05 | 285.91024 |
| Rh_PN_SNP43 | 6 | 67.2 | 2.00E-42 | 0     | 0.35  | -0.49 | 0     | -1.82 | -9.65 | 0.56522 | 1018.13864  | 53 | 0.47925 | 1.37451 | 1.37E-05 | 195.58659 |
| Rh_PN_SNP44 | 7 | 7.8  | 7.71E-09 | -     | 1.02  | 0     | -     | 16    | 0     | 0.13483 | 41.22348    | 85 | 0.29084 | 1.57254 | 0.03743  | 318.15097 |
| Rh_PN_SNP45 | 7 | 20.7 | 1.45E-62 | -     | 0     | -0.36 | -     | 0     | -0.07 | 0.81905 | 2337.15347  | 84 | 0.60324 | 1.52205 | 1.52E-05 | 322.22456 |
| Rh_PN_SNP46 | 7 | 40.9 | 3.40E-63 | 0     | -0.61 | -     | 0     | -7.61 | -     | 0.28571 | 13129.54454 | 52 | 0.79816 | 1.16879 | 1.17E-05 | 184.20884 |
| Rh_PN_SNP47 | 7 | 53.8 | 6.71E-47 | 0     | 0.35  | -     | 0     | 13.39 | -     | 0.27778 | 3171.37443  | 51 | 0.60087 | 1.10259 | 1.10E-05 | 175.54324 |

<sup>1)</sup> The effect of the genotypic class with the lowest frequency is set to zero. The effects of the other genotypic classes are given as deviations between their estimated values and the lowest frequency class.



**Suppl. Table S10.** Significant SNPs associated with petal length in roses.

| SNP-marker  | Chr | Position<br>(Mbp) | p-value  | Effects |       |        | MAF     | F        | errordf | markerR2 | Genetic Var | Residual Var | -2LnLikelihood |
|-------------|-----|-------------------|----------|---------|-------|--------|---------|----------|---------|----------|-------------|--------------|----------------|
|             |     |                   |          | A:A     | A:B   | B:B    |         |          |         |          |             |              |                |
| Rh_PL_SNP1  | 0   | 0.1               | 7.22E-07 | 13.22   | 8.85  | 0      | 0.35088 | 16.77835 | 86      | 0.23161  | 31.99041    | 8.61594      | 579.81215      |
| Rh_PL_SNP3  | 1   | 64.3              | 1.78E-07 | 0       | 8.89  | -      | 0.36709 | 33.22099 | 75      | 0.24785  | 30.79522    | 9.03166      | 506.42776      |
| Rh_PL_SNP2  | 1   | 64.3              | 2.29E-07 | -       | 8.89  | 0      | 0.56688 | 31.74548 | 85      | 0.21113  | 27.11305    | 10.60303     | 569.75607      |
| Rh_PL_SNP4  | 1   | 64.3              | 2.86E-07 | -       | 8.56  | 0      | 0.57778 | 31.97832 | 74      | 0.22821  | 29.13684    | 8.85313      | 495.45991      |
| Rh_PL_SNP6  | 1   | 64.5              | 2.39E-07 | -       | 8.72  | 0      | 0.57778 | 32.39115 | 75      | 0.21518  | 25.23308    | 9.96849      | 496.92794      |
| Rh_PL_SNP7  | 1   | 64.5              | 2.97E-07 | -       | 8.32  | 0      | 0.57778 | 31.78117 | 75      | 0.19920  | 22.21971    | 9.55375      | 487.08433      |
| Rh_PL_SNP5  | 1   | 64.5              | 9.98E-07 | 0       | 8.16  | -      | 0.38333 | 27.82372 | 86      | 0.18961  | 27.79586    | 11.51079     | 577.14941      |
| Rh_PL_SNP8  | 1   | 64.6              | 3.99E-07 | 0       | 8.99  | -      | 0.38235 | 30.52031 | 81      | 0.21577  | 30.36635    | 10.46215     | 547.84588      |
| Rh_PL_SNP9  | 1   | 64.7              | 8.04E-07 | -       | 8.21  | 0      | 0.5625  | 28.38064 | 86      | 0.18782  | 26.07880    | 11.23725     | 574.01234      |
| Rh_PL_SNP10 | 1   | 64.7              | 9.97E-07 | 0       | 8.11  | -      | 0.38095 | 28.15665 | 80      | 0.17181  | 21.39664    | 11.93274     | 524.59463      |
| Rh_PL_SNP11 | 1   | 64.7              | 1.00E-06 | 0       | 7.96  | -      | 0.38636 | 27.92177 | 84      | 0.17278  | 22.51358    | 11.15889     | 553.67579      |
| Rh_PL_SNP12 | 2   | 65.6              | 1.34E-06 | 21.39   | 9.64  | 0      | 0.50667 | 16.20516 | 78      | 0.19527  | 15.17913    | 20.39553     | 510.68557      |
| Rh_PL_SNP13 | 2   | 67                | 1.58E-06 | 0       | 7.49  | 17.53  | 0.45775 | 16.17306 | 73      | 0.25384  | 28.96014    | 9.11260      | 487.72703      |
| Rh_PL_SNP14 | 2   | 68.7              | 7.45E-08 | 21.84   | 12.02 | 0      | 0.25850 | 20.94074 | 71      | 0.29102  | 26.55237    | 7.87423      | 470.56206      |
| Rh_PL_SNP15 | 3   | 34.8              | 6.36E-07 | 0       | 8.37  | 12.05  | 0.44079 | 17.36211 | 76      | 0.25951  | 33.40497    | 8.11468      | 513.87081      |
| Rh_PL_SNP16 | 3   | 36                | 4.86E-07 | -8.68   | 1.1   | 0      | 0.47682 | 17.75595 | 76      | 0.27138  | 37.83200    | 7.09572      | 517.11428      |
| Rh_PL_SNP17 | 3   | 36.9              | 1.60E-06 | -       | 7.78  | 0      | 0.57037 | 27.34375 | 73      | 0.22283  | 34.33311    | 9.33555      | 495.52926      |
| Rh_PL_SNP18 | 3   | 42.7              | 1.48E-06 | 0       | -4.15 | -13.97 | 0.62931 | 27.77305 | 70      | 0.23412  | 31.75840    | 10.84623     | 472.38130      |
| Rh_PL_SNP19 | 3   | 64.6              | 6.99E-07 | 0       | 0.86  | -9.8   | 0.46626 | 17.00976 | 81      | 0.25006  | 35.62380    | 7.55399      | 553.04266      |
| Rh_PL_SNP20 | 4   | 56.1              | 1.14E-07 | 2.82    | 0     | -      | 0.26415 | 38.45997 | 50      | 0.11056  | 35.72104    | 0.11662      | 334.43349      |
| Rh_PL_SNP22 | 5   | 10.5              | 8.15E-07 | -       | 10.68 | 0      | 0.59375 | 28.10049 | 91      | 0.18650  | 28.77672    | 10.60413     | 611.20469      |
| Rh_PL_SNP21 | 5   | 10.5              | 1.20E-06 | -       | 10.9  | 0      | 0.61029 | 27.73223 | 79      | 0.20616  | 30.71745    | 10.60756     | 530.35257      |
| Rh_PL_SNP23 | 5   | 10.9              | 2.32E-07 | -       | 12.17 | 0      | 0.60584 | 32.13911 | 79      | 0.23306  | 30.88788    | 10.02637     | 529.47389      |
| Rh_PL_SNP24 | 5   | 10.9              | 1.39E-06 | -       | 11.71 | 0      | 0.29221 | 27.65399 | 74      | 0.21839  | 30.98776    | 10.65629     | 496.39716      |
| Rh_PL_SNP25 | 5   | 11.1              | 2.77E-07 | 0       | 11.62 | -      | 0.33523 | 31.29625 | 84      | 0.21595  | 28.68533    | 10.51656     | 563.67109      |
| Rh_PL_SNP27 | 5   | 11.4              | 8.50E-08 | 0       | 12.24 | -      | 0.32738 | 34.84286 | 80      | 0.24834  | 29.10187    | 9.96903      | 534.06046      |
| Rh_PL_SNP26 | 5   | 11.4              | 4.69E-07 | 0       | 11.76 | -      | 0.29054 | 30.94442 | 70      | 0.24419  | 31.50258    | 10.26391     | 468.14646      |
| Rh_PL_SNP28 | 5   | 12.7              | 6.86E-07 | 0       | 12.82 | -      | 0.33133 | 29.20796 | 79      | 0.21686  | 30.21024    | 10.36051     | 530.72110      |
| Rh_PL_SNP29 | 5   | 12.7              | 7.62E-07 | 0       | 10.77 | -      | 0.31176 | 28.80297 | 81      | 0.20767  | 30.06434    | 10.69255     | 543.50118      |
| Rh_PL_SNP30 | 5   | 12.8              | 9.92E-08 | 0       | 11.09 | -      | 0.33333 | 33.72199 | 89      | 0.21888  | 27.34319    | 9.36825      | 592.65074      |
| Rh_PL_SNP31 | 5   | 12.8              | 1.65E-07 | 0       | 11.11 | -      | 0.32447 | 32.29508 | 90      | 0.20995  | 27.86633    | 10.28847     | 602.35214      |
| Rh_PL_SNP32 | 5   | 12.8              | 3.23E-07 | -       | 11.06 | 0      | 0.61379 | 30.82452 | 85      | 0.21081  | 29.65405    | 10.44296     | 570.38159      |
| Rh_PL_SNP34 | 5   | 13                | 2.69E-08 | -       | 12.35 | 0      | 0.625   | 39.20242 | 71      | 0.28975  | 28.22676    | 8.97360      | 467.57646      |
| Rh_PL_SNP33 | 5   | 13                | 1.48E-06 | -       | 12.97 | 0      | 0.47059 | 16.10072 | 77      | 0.24434  | 35.89935    | 7.85895      | 525.12707      |
| Rh_PL_SNP36 | 5   | 13.1              | 3.37E-07 | -       | 10.65 | 0      | 0.625   | 30.91074 | 82      | 0.20946  | 26.80069    | 10.58597     | 544.73056      |
| Rh_PL_SNP37 | 5   | 13.1              | 3.63E-07 | 0       | 10.63 | -      | 0.61806 | 30.51455 | 85      | 0.20408  | 27.54098    | 10.66115     | 566.42027      |

|             |   |      |          |       |       |       |         |           |    |         |          |          |           |
|-------------|---|------|----------|-------|-------|-------|---------|-----------|----|---------|----------|----------|-----------|
| Rh_PL_SNP35 | 5 | 13.1 | 1.20E-06 | 0     | 10.01 | -     | 0.30899 | 27.39440  | 85 | 0.18983 | 26.78510 | 10.87583 | 565.30094 |
| Rh_PL_SNP39 | 5 | 13.3 | 1.05E-07 | 0     | 11.47 | -     | 0.30357 | 34.24903  | 80 | 0.23055 | 27.04455 | 10.17389 | 530.35985 |
| Rh_PL_SNP38 | 5 | 13.3 | 2.20E-07 | 0     | 11.31 | -     | 0.30588 | 32.05896  | 82 | 0.21758 | 27.18023 | 11.18767 | 548.00266 |
| Rh_PL_SNP40 | 5 | 13.7 | 5.44E-07 | -     | 12.74 | 0     | 0.61789 | 30.27395  | 73 | 0.23075 | 29.09507 | 11.06721 | 488.21371 |
| Rh_PL_SNP41 | 5 | 13.8 | 2.35E-07 | 0     | 12.18 | -     | 0.31579 | 32.70865  | 72 | 0.24029 | 26.73281 | 10.64248 | 479.49963 |
| Rh_PL_SNP42 | 5 | 13.8 | 1.52E-06 | 0     | 11.11 | -     | 0.28947 | 27.49138  | 73 | 0.21193 | 30.98569 | 10.58253 | 488.20452 |
| Rh_PL_SNP45 | 5 | 14.1 | 1.27E-06 | 0     | 10.47 | -     | 0.32222 | 27.20660  | 86 | 0.18975 | 29.52243 | 10.86645 | 579.20059 |
| Rh_PL_SNP44 | 5 | 14.1 | 1.34E-06 | 0     | 10.56 | -     | 0.60811 | 27.07242  | 86 | 0.18743 | 29.36577 | 10.85967 | 578.77927 |
| Rh_PL_SNP43 | 5 | 14.1 | 1.39E-06 | 0     | 10.97 | -     | 0.608   | 27.78742  | 72 | 0.23126 | 33.42963 | 11.06265 | 491.51836 |
| Rh_PL_SNP46 | 5 | 14.4 | 1.27E-06 | 0     | 12.06 | -     | 0.32738 | 27.51988  | 80 | 0.19660 | 28.69775 | 10.55716 | 536.19412 |
| Rh_PL_SNP47 | 5 | 14.5 | 1.01E-06 | 0     | 10.82 | -     | 0.31176 | 28.06978  | 81 | 0.19963 | 29.08049 | 10.77730 | 541.77992 |
| Rh_PL_SNP49 | 5 | 14.5 | 1.16E-06 | 0     | 10.86 | -     | 0.31034 | 27.58177  | 83 | 0.19903 | 31.34856 | 10.71608 | 560.09770 |
| Rh_PL_SNP48 | 5 | 14.5 | 1.56E-06 | -     | 10.2  | 0     | 0.61111 | 26.77613  | 84 | 0.18390 | 27.21955 | 10.88118 | 560.29460 |
| Rh_PL_SNP50 | 5 | 14.8 | 1.55E-06 | -     | 10.24 | 0     | 0.61940 | 27.00106  | 80 | 0.19467 | 28.44473 | 10.55846 | 535.72295 |
| Rh_PL_SNP52 | 5 | 14.9 | 2.36E-07 | 0     | 8.81  | -     | 0.33133 | 32.09512  | 79 | 0.23260 | 32.11153 | 8.98740  | 531.18734 |
| Rh_PL_SNP54 | 5 | 14.9 | 5.51E-07 | 0     | 8.55  | -     | 0.58861 | 29.19867  | 89 | 0.19522 | 28.96967 | 10.50274 | 597.47807 |
| Rh_PL_SNP53 | 5 | 14.9 | 7.82E-07 | -     | 8.46  | 0     | 0.58861 | 28.29850  | 89 | 0.19210 | 29.83268 | 10.51207 | 599.38590 |
| Rh_PL_SNP51 | 5 | 14.9 | 1.22E-06 | 0     | 8.11  | -     | 0.33721 | 27.51774  | 82 | 0.18178 | 26.06756 | 10.26116 | 543.81779 |
| Rh_PL_SNP56 | 5 | 15   | 6.62E-08 | 0     | 9.44  | -     | 0.30263 | 36.38068  | 72 | 0.25051 | 27.63242 | 8.24974  | 474.35650 |
| Rh_PL_SNP55 | 5 | 15   | 2.47E-07 | 0     | 8.94  | -     | 0.33721 | 31.75087  | 82 | 0.22163 | 28.95361 | 10.28337 | 548.69179 |
| Rh_PL_SNP59 | 5 | 15.1 | 4.93E-09 | 0     | 9.86  | -     | 0.33333 | 42.42048  | 86 | 0.27737 | 31.22759 | 7.21802  | 577.92206 |
| Rh_PL_SNP57 | 5 | 15.1 | 7.59E-08 | 0     | 11.09 | -     | 0.31098 | 35.34968  | 78 | 0.24093 | 30.77830 | 8.75202  | 523.96755 |
| Rh_PL_SNP58 | 5 | 15.1 | 4.08E-07 | 0     | 8.55  | -     | 0.33152 | 30.03364  | 88 | 0.20247 | 28.92946 | 10.49713 | 591.36345 |
| Rh_PL_SNP60 | 5 | 15.4 | 8.66E-07 | 0     | 8.31  | -     | 0.32468 | 29.00069  | 73 | 0.22418 | 28.04814 | 11.88595 | 487.34667 |
| Rh_PL_SNP61 | 5 | 16.1 | 1.57E-09 | 14.63 | 10.86 | 0     | 0.50355 | 26.78751  | 77 | 0.33727 | 27.21165 | 7.30505  | 506.77755 |
| Rh_PL_SNP62 | 5 | 20.5 | 8.53E-07 | 11.59 | 9.63  | 0     | 0.5     | 17.28328  | 69 | 0.27981 | 33.98908 | 6.36232  | 465.82766 |
| Rh_PL_SNP63 | 5 | 61.2 | 1.35E-06 | 0     | 8.01  | -     | 0.33152 | 26.95820  | 88 | 0.18724 | 30.22658 | 10.65014 | 595.73359 |
| Rh_PL_SNP64 | 5 | 61.8 | 1.74E-07 | 0     | 5.6   | -4.65 | 0.47287 | 20.04088  | 65 | 0.33040 | 44.10809 | 3.63651  | 453.19245 |
| Rh_PL_SNP65 | 6 | 16.5 | 9.09E-08 | 0     | 10.36 | -     | 0.45070 | 36.05650  | 67 | 0.27795 | 33.94573 | 6.98072  | 450.78719 |
| Rh_PL_SNP66 | 6 | 59.1 | 7.10E-12 | 0     | 4.44  | -     | 0.44915 | 75.91221  | 55 | 0.19306 | 37.13230 | 0.11908  | 371.44245 |
| Rh_PL_SNP67 | 6 | 62.2 | 1.64E-06 | 0     | 9.08  | -     | 0.31111 | 26.54983  | 86 | 0.18084 | 28.52696 | 9.43016  | 575.46635 |
| Rh_PL_SNP68 | 7 | 40.9 | 1.25E-20 | 0     | 0.46  | -     | 0.28571 | 232.33177 | 52 | 0.72046 | 40.43295 | 4.04E-04 | 363.38526 |

<sup>1)</sup> The effect of the genotypic class with the lowest frequency is set to zero. The effects of the other genotypic classes are given as deviations between their estimated values and the lowest frequency class.

**Suppl. Table S11.** Significant SNPs associated with fragrance in roses.

| SNP-marker  | Chr | Position<br>(Mbp) | p-value  | Effects <sup>1)</sup><br>(Box Cox) |       |       | Effects<br>(nontransformed) |       |       | MAF     | F         | errordf | markerR2 | Genetic Var | Residual Var | -2LnLikelihood |
|-------------|-----|-------------------|----------|------------------------------------|-------|-------|-----------------------------|-------|-------|---------|-----------|---------|----------|-------------|--------------|----------------|
|             |     |                   |          | AA                                 | AB    | BB    | AA                          | AB    | BB    |         |           |         |          |             |              |                |
| Rh_FR_SNP1  | 0   | 10.7              | 6.52E-07 | 1.08                               | 0.24  | 0     | 0.95                        | -0.03 | 0     | 0.23494 | 17.10799  | 81      | 0.23736  | 0.16581     | 0.06868      | 137.76845      |
| Rh_FR_SNP2  | 0   | 19.6              | 4.15E-07 | -                                  | 0     | 0.77  | -                           | 0     | 0.94  | 0.19565 | 29.99250  | 88      | 0.19681  | 0.07982     | 0.17732      | 146.41922      |
| Rh_FR_SNP3  | 0   | 22.5              | 1.36E-08 | -                                  | 0     | 0.82  | -                           | 0     | 1.01  | 0.65909 | 39.68718  | 84      | 0.24719  | 0.08527     | 0.15240      | 134.80363      |
| Rh_FR_SNP7  | 0   | 22.5              | 2.11E-08 | 0.75                               | 0     | -     | 0.93                        | 0     | -     | 0.25806 | 37.96701  | 89      | 0.23242  | 0.10643     | 0.11526      | 140.62790      |
| Rh_FR_SNP6  | 0   | 22.5              | 2.70E-07 | 0.66                               | 0     | -     | 0.85                        | 0     | -     | 0.26344 | 31.06211  | 89      | 0.19553  | 0.10253     | 0.10969      | 137.85349      |
| Rh_FR_SNP5  | 0   | 22.5              | 7.32E-07 | -                                  | 0     | 0.73  | -                           | 0     | 0.89  | 0.71    | 29.78908  | 69      | 0.21923  | 0.10159     | 0.08521      | 99.84660       |
| Rh_FR_SNP4  | 0   | 22.5              | 1.51E-06 | -                                  | 0     | 0.69  | -                           | 0     | 0.88  | 0.64706 | 26.81799  | 85      | 0.18194  | 0.10250     | 0.12403      | 135.53351      |
| Rh_FR_SNP9  | 0   | 22.7              | 1.96E-09 | -                                  | 0     | 0.83  | -                           | 0     | 1.04  | 0.68595 | 45.97665  | 80      | 0.26505  | 0.03416     | 0.20489      | 119.94471      |
| Rh_FR_SNP8  | 0   | 22.7              | 6.44E-08 | -                                  | 0     | 0.78  | -                           | 0     | 0.96  | 0.65185 | 35.19516  | 85      | 0.23018  | 0.08348     | 0.15997      | 137.46156      |
| Rh_FR_SNP10 | 0   | 22.8              | 4.46E-10 | -                                  | 0     | 0.97  | -                           | 0     | 1.11  | 0.63846 | 50.65273  | 80      | 0.31827  | 0.13016     | 0.06483      | 122.49333      |
| Rh_FR_SNP11 | 0   | 22.8              | 9.23E-07 | -                                  | 0     | 0.74  | -                           | 0     | 0.86  | 0.64394 | 28.24059  | 82      | 0.20274  | 0.12994     | 0.06229      | 124.87381      |
| Rh_FR_SNP18 | 0   | 22.9              | 4.41E-09 | 0.79                               | 0     | -     | 0.98                        | 0     | -     | 0.25269 | 42.42298  | 89      | 0.24296  | 0.06996     | 0.16748      | 138.95309      |
| Rh_FR_SNP19 | 0   | 22.9              | 7.46E-09 | -                                  | 0     | 0.78  | -                           | 0     | 0.95  | 0.67742 | 41.77661  | 81      | 0.24888  | 0.09407     | 0.09627      | 115.88475      |
| Rh_FR_SNP16 | 0   | 22.9              | 2.08E-08 | 0.76                               | 0     | -     | 0.93                        | 0     | -     | 0.25269 | 38.01246  | 89      | 0.22642  | 0.07134     | 0.17817      | 143.38233      |
| Rh_FR_SNP14 | 0   | 22.9              | 6.11E-08 | 0.73                               | 0     | -     | 0.85                        | 0     | -     | 0.25556 | 35.26130  | 86      | 0.19904  | 0.00799     | 0.28398      | 139.28577      |
| Rh_FR_SNP17 | 0   | 22.9              | 1.82E-07 | 0.72                               | 0     | -     | 0.94                        | 0     | -     | 0.25843 | 32.36528  | 85      | 0.20493  | 0.09735     | 0.11587      | 131.85781      |
| Rh_FR_SNP15 | 0   | 22.9              | 3.17E-07 | -                                  | 0     | 0.74  | -                           | 0     | 0.93  | 0.20556 | 30.81096  | 86      | 0.20982  | 0.11374     | 0.12409      | 142.54458      |
| Rh_FR_SNP13 | 0   | 22.9              | 3.95E-07 | 0.71                               | 0     | -     | 0.82                        | 0     | -     | 0.26667 | 30.23218  | 86      | 0.18200  | 0.02559     | 0.27235      | 144.45577      |
| Rh_FR_SNP12 | 0   | 22.9              | 1.01E-06 | 0.65                               | 0     | -     | 0.81                        | 0     | -     | 0.22840 | 28.25208  | 78      | 0.19190  | 0.09271     | 0.12041      | 119.30429      |
| Rh_FR_SNP20 | 0   | 73                | 1.15E-06 | -                                  | 0     | 0.77  | -                           | 0     | 1     | 0.65323 | 27.89374  | 78      | 0.19971  | 0.05757     | 0.22757      | 133.55057      |
| Rh_FR_SNP21 | 1   | 5.1               | 6.60E-31 | 0                                  | -1.49 | -1.59 | 0                           | -0.85 | -0.99 | 0.56923 | 208.49572 | 74      | 0.54585  | 0.24860     | 0.00223      | 131.07617      |
| Rh_FR_SNP22 | 1   | 12.6              | 2.48E-07 | -                                  | 0.85  | 0     | -                           | 1.08  | 0     | 0.83333 | 31.11039  | 92      | 0.19755  | 0.15323     | 0.07498      | 153.22870      |
| Rh_FR_SNP23 | 1   | 24.9              | 1.00E-12 | -                                  | 0.24  | 0     | -                           | 0.01  | 0     | 0.62025 | 97.40812  | 45      | 0.02132  | 0.21335     | 2.13E-06     | 81.00801       |
| Rh_FR_SNP24 | 1   | 61.8              | 8.39E-58 | -0.12                              | 0     | -     | -0.08                       | 0     | -     | 0.22143 | 3388.563  | 66      | 0.75373  | 0.19957     | 2.00E-06     | 108.66187      |
| Rh_FR_SNP25 | 1   | 64.6              | 1.10E-15 | -                                  | 0     | 0.25  | -                           | 0     | 0.34  | 0.84    | 116.50097 | 61      | 0.52976  | 0.22084     | 5.07E-05     | 103.96366      |
| Rh_FR_SNP26 | 2   | 2.2               | 2.58E-18 | 1.41                               | 0.13  | 0     | 1.25                        | 0.14  | 0     | 0.58824 | 70.62034  | 80      | 0.46820  | 0.22844     | 0.00909      | 135.25460      |
| Rh_FR_SNP27 | 2   | 6.3               | 2.38E-07 | 0                                  | -0.84 | -0.8  | 0                           | -0.65 | -0.8  | 0.50714 | 18.93378  | 74      | 0.24023  | 0.26386     | 0.01004      | 147.21143      |
| Rh_FR_SNP28 | 2   | 62.3              | 6.29E-08 | 0                                  | 0.74  | -     | 0                           | 0.86  | -     | 0.22396 | 34.74569  | 92      | 0.21271  | 0.13829     | 0.08295      | 149.52234      |
| Rh_FR_SNP29 | 2   | 62.4              | 7.75E-08 | 0                                  | 0.69  | -     | 0                           | 0.86  | -     | 0.22581 | 34.38920  | 89      | 0.21551  | 0.13013     | 0.09107      | 142.54325      |
| Rh_FR_SNP30 | 2   | 62.7              | 1.26E-07 | 0                                  | 0.27  | 1.1   | 0                           | 0.06  | 0.96  | 0.60993 | 19.13442  | 89      | 0.23649  | 0.15915     | 0.05740      | 143.41267      |
| Rh_FR_SNP36 | 2   | 63.4              | 2.48E-07 | -                                  | 0.75  | 0     | -                           | 0.87  | 0     | 0.65672 | 31.52521  | 85      | 0.20701  | 0.12979     | 0.06781      | 128.24134      |
| Rh_FR_SNP31 | 2   | 63.4              | 4.24E-07 | 0                                  | 0.71  | -     | 0                           | 0.81  | -     | 0.27368 | 29.77132  | 91      | 0.18952  | 0.13088     | 0.06521      | 137.89539      |
| Rh_FR_SNP33 | 2   | 63.4              | 4.24E-07 | 0                                  | 0.71  | -     | 0                           | 0.81  | -     | 0.27368 | 29.77132  | 91      | 0.18952  | 0.13088     | 0.06521      | 137.89539      |
| Rh_FR_SNP34 | 2   | 63.4              | 4.24E-07 | 0                                  | 0.71  | -     | -                           | 0     | 0.81  | 0.27368 | 29.77132  | 91      | 0.18952  | 0.13088     | 0.06521      | 137.89539      |
| Rh_FR_SNP35 | 2   | 63.4              | 4.24E-07 | 0                                  | 0.71  | -     | 0                           | 0.81  | -     | 0.27368 | 29.77132  | 91      | 0.18952  | 0.13088     | 0.06521      | 137.89539      |

|             |   |      |          |       |      |       |       |      |       |         |          |    |         |         |         |           |
|-------------|---|------|----------|-------|------|-------|-------|------|-------|---------|----------|----|---------|---------|---------|-----------|
| Rh_FR_SNP32 | 2 | 63.4 | 6.43E-07 | 0     | 0.74 | -     | 0     | 0.86 | -     | 0.26374 | 28.90437 | 87 | 0.19345 | 0.13506 | 0.06804 | 134.16221 |
| Rh_FR_SNP37 | 2 | 63.4 | 8.67E-07 | -     | 0.7  | 0     | -     | 0.8  | 0     | 0.64583 | 27.98841 | 90 | 0.18256 | 0.13293 | 0.06501 | 138.13021 |
| Rh_FR_SNP39 | 2 | 63.5 | 8.33E-08 | 0     | 0.86 | -     | 0     | 0.93 | -     | 0.21429 | 36.45552 | 66 | 0.28182 | 0.13976 | 0.08801 | 105.35738 |
| Rh_FR_SNP38 | 2 | 63.5 | 1.49E-06 | -     | 0    | 0.86  | -     | 0    | 0.98  | 0.74286 | 27.39679 | 75 | 0.20492 | 0.14260 | 0.07859 | 121.78587 |
| Rh_FR_SNP40 | 2 | 63.7 | 1.35E-06 | 0.76  | 0    | -     | 0.78  | 0    | -     | 0.18889 | 27.05700 | 86 | 0.18280 | 0.14549 | 0.07572 | 139.22934 |
| Rh_FR_SNP41 | 2 | 64.2 | 1.56E-06 | 1.09  | 0.27 | 0     | 1.31  | 0.42 | 0     | 0.24294 | 15.68160 | 87 | 0.20661 | 0.15360 | 0.08033 | 145.63847 |
| Rh_FR_SNP42 | 2 | 65   | 9.79E-07 | -0.71 | 0    | -     | -0.72 | 0    | -     | 0.27128 | 27.67871 | 90 | 0.18388 | 0.15143 | 0.08654 | 152.68690 |
| Rh_FR_SNP43 | 2 | 65.2 | 7.13E-07 | -0.76 | 0    | -     | -0.69 | 0    | -     | 0.29670 | 28.63908 | 87 | 0.19542 | 0.16025 | 0.08025 | 148.93746 |
| Rh_FR_SNP44 | 2 | 65.6 | 3.63E-07 | -     | 0    | -0.75 | -     | 0    | -0.75 | 0.64789 | 30.22727 | 90 | 0.19591 | 0.15070 | 0.08217 | 150.91083 |
| Rh_FR_SNP45 | 2 | 65.8 | 6.00E-07 | -0.77 | 0    | -     | -0.79 | 0    | -     | 0.24118 | 29.43431 | 81 | 0.20734 | 0.15485 | 0.08188 | 134.52834 |
| Rh_FR_SNP47 | 2 | 65.9 | 7.91E-10 | 1.3   | 0.33 | 0     | 1.41  | 0.32 | 0     | 0.22293 | 27.96448 | 77 | 0.32698 | 0.14084 | 0.04414 | 111.09097 |
| Rh_FR_SNP46 | 2 | 65.9 | 6.65E-08 | 1.19  | 0.38 | 0     | 1.23  | 0.36 | 0     | 0.23313 | 20.52039 | 80 | 0.26135 | 0.15483 | 0.04828 | 124.64723 |
| Rh_FR_SNP48 | 2 | 66   | 4.02E-07 | -     | 0    | 0.72  | -     | 0    | 0.81  | 0.72358 | 30.18562 | 86 | 0.19858 | 0.10908 | 0.12921 | 143.71486 |
| Rh_FR_SNP50 | 2 | 66.5 | 1.31E-09 | -     | 0    | 0.93  | -     | 0    | 1.01  | 0.67692 | 46.51190 | 85 | 0.28506 | 0.14172 | 0.06451 | 133.59395 |
| Rh_FR_SNP49 | 2 | 66.5 | 1.44E-06 | -     | 0.66 | 0     | -     | 0.73 | 0     | 0.63333 | 26.62015 | 92 | 0.17303 | 0.13762 | 0.10019 | 155.13073 |
| Rh_FR_SNP51 | 2 | 66.7 | 4.63E-07 | 0.9   | 0    | -     | 0.98  | 0    | -     | 0.2     | 30.89037 | 71 | 0.24055 | 0.15503 | 0.04485 | 110.09588 |
| Rh_FR_SNP52 | 2 | 66.7 | 9.87E-07 | -     | 0    | 0.72  | -     | 0    | 0.83  | 0.69466 | 27.75218 | 88 | 0.19016 | 0.14359 | 0.09327 | 149.22680 |
| Rh_FR_SNP53 | 2 | 66.7 | 1.20E-06 | -     | 0    | 0.69  | 0     | 0.82 | -     | 0.72358 | 27.35559 | 86 | 0.19196 | 0.13430 | 0.10187 | 144.38870 |
| Rh_FR_SNP54 | 2 | 66.9 | 8.46E-08 | -     | 0    | 0.83  | -     | 0    | 0.87  | 0.67442 | 34.52075 | 84 | 0.23541 | 0.14273 | 0.07239 | 136.09644 |
| Rh_FR_SNP55 | 2 | 67   | 2.58E-07 | -     | 0    | 0.75  | -     | 0    | 0.84  | 0.71774 | 31.36017 | 86 | 0.21165 | 0.13241 | 0.10055 | 144.12853 |
| Rh_FR_SNP56 | 2 | 67.6 | 2.42E-09 | 0.9   | 0    | -     | 1.03  | 0    | -     | 0.22941 | 45.17798 | 81 | 0.29795 | 0.13547 | 0.07028 | 125.99980 |
| Rh_FR_SNP57 | 2 | 67.9 | 4.15E-07 | 0.71  | 0    | -     | 0.85  | 0    | -     | 0.67769 | 30.55414 | 79 | 0.21043 | 0.05121 | 0.24904 | 136.40979 |
| Rh_FR_SNP58 | 2 | 67.9 | 9.31E-07 | 0.74  | 0    | -     | 0.91  | 0    | -     | 0.20253 | 28.65896 | 75 | 0.21194 | 0.07230 | 0.19949 | 125.85118 |
| Rh_FR_SNP62 | 2 | 68.1 | 8.86E-08 | -     | 0    | 0.84  | -     | 0    | 0.95  | 0.66929 | 34.55508 | 82 | 0.23332 | 0.12633 | 0.05649 | 119.89669 |
| Rh_FR_SNP61 | 2 | 68.1 | 6.61E-07 | -     | 0    | 0.84  | -     | 0    | 1.02  | 0.68696 | 29.51328 | 76 | 0.22055 | 0.08006 | 0.18605 | 128.72135 |
| Rh_FR_SNP60 | 2 | 68.1 | 1.69E-06 | 0.7   | 0    | -     | 0.83  | 0    | -     | 0.18539 | 26.52453 | 85 | 0.18529 | 0.08832 | 0.18186 | 144.99687 |
| Rh_FR_SNP59 | 2 | 68.1 | 1.71E-06 | 0.75  | 0    | -     | 0.85  | 0    | -     | 0.15854 | 26.85739 | 78 | 0.18528 | 0.07650 | 0.19104 | 131.13660 |
| Rh_FR_SNP63 | 2 | 68.8 | 3.17E-07 | 0.71  | 0    | -     | 0.86  | 0    | -     | 0.70370 | 31.68317 | 74 | 0.21968 | 0.05813 | 0.20109 | 119.59107 |
| Rh_FR_SNP64 | 2 | 69   | 6.21E-07 | -     | 0    | 0.71  | -     | 0    | 0.88  | 0.69841 | 29.10643 | 85 | 0.20565 | 0.10547 | 0.14141 | 142.29891 |
| Rh_FR_SNP65 | 2 | 69.8 | 3.12E-09 | 0.93  | 0    | -     | 1.14  | 0    | -     | 0.17123 | 46.17916 | 70 | 0.28667 | 0.03904 | 0.19408 | 103.47006 |
| Rh_FR_SNP66 | 2 | 69.8 | 5.94E-09 | 0.8   | 0    | -     | 1.03  | 0    | -     | 0.25269 | 41.56258 | 89 | 0.23318 | 0.04455 | 0.21935 | 142.28022 |
| Rh_FR_SNP68 | 2 | 69.9 | 9.82E-12 | -     | 0    | 1.08  | -     | 0    | 1.32  | 0.65041 | 64.41586 | 77 | 0.37507 | 0.12974 | 0.04874 | 110.55066 |
| Rh_FR_SNP67 | 2 | 69.9 | 6.68E-10 | 0.82  | 0    | -     | 1.01  | 0    | -     | 0.23889 | 48.42807 | 86 | 0.25243 | 0.01628 | 0.25330 | 134.48049 |
| Rh_FR_SNP70 | 2 | 70.1 | 3.10E-11 | 0.91  | 0    | -     | 1.15  | 0    | -     | 0.22727 | 58.65346 | 84 | 0.30951 | 0.03799 | 0.19408 | 124.37349 |
| Rh_FR_SNP80 | 2 | 70.1 | 3.84E-11 | -     | 0    | 0.85  | -     | 0    | 1.07  | 0.66912 | 57.15464 | 88 | 0.29077 | 0.02420 | 0.22066 | 131.54844 |
| Rh_FR_SNP79 | 2 | 70.1 | 1.96E-10 | -     | 0    | 0.87  | -     | 0    | 1.09  | 0.67669 | 52.10801 | 87 | 0.27782 | 0.04843 | 0.19231 | 132.94037 |
| Rh_FR_SNP77 | 2 | 70.1 | 2.06E-10 | 0.83  | 0    | -     | 1.06  | 0    | -     | 0.24737 | 51.35215 | 91 | 0.26693 | 0.05198 | 0.18032 | 136.91347 |
| Rh_FR_SNP69 | 2 | 70.1 | 3.84E-10 | -     | 0    | 0.86  | -     | 0    | 1.09  | 0.67717 | 50.61590 | 83 | 0.28033 | 0.02968 | 0.22922 | 128.74135 |
| Rh_FR_SNP76 | 2 | 70.1 | 3.86E-10 | 0.84  | 0    | -     | 1.06  | 0    | -     | 0.23626 | 49.97793 | 87 | 0.26673 | 0.04647 | 0.18893 | 130.83245 |

|              |   |      |          |      |      |      |      |      |      |         |          |    |         |          |         |           |
|--------------|---|------|----------|------|------|------|------|------|------|---------|----------|----|---------|----------|---------|-----------|
| Rh_FR_SNP72  | 2 | 70.1 | 4.01E-10 | 0.85 | 0    | -    | 1.1  | 0    | -    | 0.21429 | 50.99438 | 80 | 0.29578 | 0.03463  | 0.19006 | 115.30116 |
| Rh_FR_SNP75  | 2 | 70.1 | 4.97E-10 | 0.83 | 0    | -    | 1.06 | 0    | -    | 0.23913 | 49.05593 | 88 | 0.26566 | 0.05489  | 0.18136 | 135.07131 |
| Rh_FR_SNP78  | 2 | 70.1 | 5.56E-10 | 0.81 | 0    | -    | 1.04 | 0    | -    | 0.24176 | 48.85332 | 87 | 0.26791 | 0.03746  | 0.21441 | 133.95955 |
| Rh_FR_SNP74  | 2 | 70.1 | 5.92E-10 | -    | 0    | 0.86 | -    | 0    | 1.04 | 0.67164 | 48.66155 | 87 | 0.24714 | 2.92E-06 | 0.29195 | 138.17936 |
| Rh_FR_SNP73  | 2 | 70.1 | 9.27E-10 | 0.84 | 0    | -    | 1.02 | 0    | -    | 0.24457 | 47.15767 | 88 | 0.23975 | 2.92E-06 | 0.29193 | 140.78373 |
| Rh_FR_SNP71  | 2 | 70.1 | 1.42E-09 | 0.81 | 0    | -    | 1.03 | 0    | -    | 0.23626 | 46.00979 | 87 | 0.25372 | 0.05544  | 0.17718 | 131.38598 |
| Rh_FR_SNP82  | 2 | 70.1 | 4.17E-09 | -    | 0.36 | 0    | 1.62 | 0.52 | 0    | 0.33588 | 26.48211 | 65 | 0.35502 | 0.12194  | 0.07749 | 96.32473  |
| Rh_FR_SNP81  | 2 | 70.1 | 3.92E-07 | 0.8  | 0    | 1.3  | 1.06 | 0    | -    | 0.35632 | 30.43895 | 83 | 0.20890 | 0.08714  | 0.16170 | 136.20452 |
| Rh_FR_SNP84  | 2 | 70.2 | 2.03E-10 | -    | 0    | 0.82 | -    | 0    | 1.04 | 0.66912 | 51.83872 | 88 | 0.26408 | 0.02696  | 0.22147 | 133.33732 |
| Rh_FR_SNP83  | 2 | 70.2 | 4.23E-10 | -    | 0    | 0.83 | -    | 0    | 1.08 | 0.68217 | 49.84079 | 86 | 0.27375 | 0.04833  | 0.18426 | 129.43681 |
| Rh_FR_SNP88  | 2 | 70.2 | 4.22E-09 | 0.83 | 0    | -    | 1.02 | 0    | -    | 0.23563 | 43.10924 | 84 | 0.23979 | 0.02659  | 0.24650 | 134.42567 |
| Rh_FR_SNP86  | 2 | 70.2 | 8.94E-09 | 0.79 | 0    | -    | 1.01 | 0    | -    | 0.25532 | 40.29577 | 90 | 0.22601 | 0.04548  | 0.21737 | 144.78739 |
| Rh_FR_SNP85  | 2 | 70.2 | 4.31E-08 | 0.76 | 0    | -    | 0.99 | 0    | -    | 0.26344 | 35.98884 | 89 | 0.20986 | 0.04118  | 0.23950 | 146.54519 |
| Rh_FR_SNP87  | 2 | 70.2 | 6.21E-08 | 0.82 | 0    | -    | -    | 1.05 | 0    | 0.29114 | 36.22972 | 75 | 0.24942 | 3.13E-06 | 0.31312 | 124.07686 |
| Rh_FR_SNP90  | 2 | 70.4 | 2.47E-11 | -    | 0    | 0.88 | -    | 0    | 1.12 | 0.67407 | 58.60634 | 88 | 0.30049 | 0.04370  | 0.18006 | 128.61998 |
| Rh_FR_SNP92  | 2 | 70.4 | 2.70E-10 | -    | 0    | 0.83 | -    | 0    | 1.07 | 0.66923 | 51.57242 | 84 | 0.29339 | 0.08863  | 0.09141 | 118.07222 |
| Rh_FR_SNP89  | 2 | 70.4 | 3.10E-10 | 0.84 | 0    | -    | 1.07 | 0    | -    | 0.24194 | 50.36979 | 89 | 0.26852 | 0.05408  | 0.18125 | 135.20061 |
| Rh_FR_SNP93  | 2 | 70.4 | 1.76E-09 | -    | 0    | 0.81 | -    | 0    | 1.03 | 0.67424 | 45.48488 | 86 | 0.25774 | 0.04889  | 0.19077 | 132.18964 |
| Rh_FR_SNP91  | 2 | 70.4 | 2.28E-09 | 1    | 0    | -    | 1.35 | 0    | -    | 0.26829 | 45.79813 | 78 | 0.27560 | 0.05796  | 0.15402 | 113.12752 |
| Rh_FR_SNP97  | 2 | 70.4 | 3.18E-09 | -    | 0    | 0.8  | -    | 0    | 0.99 | 0.65942 | 43.48545 | 88 | 0.23710 | 0.02719  | 0.24597 | 140.93885 |
| Rh_FR_SNP96  | 2 | 70.4 | 6.50E-09 | -    | 0    | 0.81 | -    | 0    | 1.02 | 0.66917 | 41.61416 | 86 | 0.23962 | 0.04041  | 0.21366 | 134.63211 |
| Rh_FR_SNP94  | 2 | 70.4 | 2.95E-07 | -    | 0    | 0.73 | -    | 0    | 0.95 | 0.62937 | 30.94270 | 87 | 0.19913 | 0.05313  | 0.22672 | 145.39276 |
| Rh_FR_SNP95  | 2 | 70.4 | 1.34E-06 | -    | 0    | 0.71 | -    | 0    | 0.91 | 0.625   | 27.26801 | 82 | 0.18454 | 0.05477  | 0.23718 | 141.26284 |
| Rh_FR_SNP98  | 2 | 70.5 | 2.78E-12 | -    | 0    | 0.92 | -    | 0    | 1.15 | 0.67669 | 66.22324 | 87 | 0.32096 | 0.03463  | 0.18380 | 122.43293 |
| Rh_FR_SNP100 | 2 | 70.5 | 2.94E-09 | 0.85 | 0    | -    | 1.08 | 0    | -    | 0.21341 | 45.00912 | 78 | 0.26478 | 0.04665  | 0.19760 | 120.33364 |
| Rh_FR_SNP99  | 2 | 70.5 | 1.57E-08 | 0.89 | 0    | -    | 1.08 | 0    | -    | 0.19178 | 41.16992 | 69 | 0.27047 | 0.08236  | 0.11183 | 98.28871  |
| Rh_FR_SNP101 | 2 | 70.8 | 3.29E-07 | -    | 0    | 0.72 | -    | 0    | 0.88 | 0.65468 | 30.59903 | 88 | 0.19241 | 0.06809  | 0.19834 | 146.60847 |
| Rh_FR_SNP102 | 2 | 70.9 | 9.39E-10 | 1    | 0    | -    | 1.14 | 0    | -    | 0.26875 | 48.96339 | 76 | 0.31878 | 0.14107  | 0.06408 | 118.42579 |
| Rh_FR_SNP103 | 2 | 71.1 | 2.10E-11 | 0.99 | 0    | -    | 1.1  | 0    | -    | 0.28333 | 59.54917 | 86 | 0.32939 | 0.12580  | 0.05914 | 127.01111 |
| Rh_FR_SNP104 | 2 | 71.1 | 2.93E-10 | 0.94 | 0    | -    | 1.07 | 0    | -    | 0.27841 | 51.31071 | 84 | 0.30800 | 0.13065  | 0.06066 | 125.35758 |
| Rh_FR_SNP106 | 2 | 71.1 | 2.46E-09 | 0.9  | 0    | -    | 0.99 | 0    | -    | 0.27586 | 44.85245 | 83 | 0.28508 | 0.13797  | 0.06385 | 127.05854 |
| Rh_FR_SNP105 | 2 | 71.1 | 2.77E-09 | 0.89 | 0    | -    | 0.99 | 0    | -    | 0.27059 | 44.76132 | 81 | 0.28992 | 0.14116  | 0.05489 | 123.02807 |
| Rh_FR_SNP107 | 2 | 71.1 | 2.53E-08 | 0.74 | 0    | -    | 0.9  | 0    | -    | 0.25    | 37.54439 | 88 | 0.22444 | 0.07109  | 0.16229 | 137.20205 |
| Rh_FR_SNP114 | 2 | 71.1 | 3.05E-08 | -    | 0    | 0.74 | -    | 0    | 0.92 | 0.65957 | 36.86371 | 90 | 0.21945 | 0.07846  | 0.16597 | 145.29744 |
| Rh_FR_SNP113 | 2 | 71.1 | 3.08E-08 | -    | 0    | 0.74 | -    | 0    | 0.91 | 0.65734 | 36.75889 | 91 | 0.21705 | 0.07759  | 0.16549 | 145.40732 |
| Rh_FR_SNP117 | 2 | 71.1 | 3.65E-08 | 0.74 | 0    | -    | 0.92 | 0    | -    | 0.25269 | 36.44317 | 89 | 0.22009 | 0.07985  | 0.16686 | 143.52119 |
| Rh_FR_SNP118 | 2 | 71.1 | 1.55E-07 | 0.7  | 0    | -    | 0.86 | 0    | -    | 0.25568 | 32.87099 | 84 | 0.20822 | 0.09158  | 0.12116 | 129.79827 |
| Rh_FR_SNP116 | 2 | 71.1 | 2.06E-07 | 0.68 | 0    | -    | 0.87 | 0    | -    | 0.26374 | 31.89404 | 87 | 0.20645 | 0.11863  | 0.08173 | 133.98335 |
| Rh_FR_SNP108 | 2 | 71.1 | 2.14E-07 | 0    | 0.57 | 1.4  | 0    | 0.64 | 1.7  | 0.50909 | 18.49907 | 86 | 0.23336 | 0.09997  | 0.13445 | 139.80505 |

|              |   |      |          |       |       |      |       |       |      |         |           |    |         |          |          |           |
|--------------|---|------|----------|-------|-------|------|-------|-------|------|---------|-----------|----|---------|----------|----------|-----------|
| Rh_FR_SNP115 | 2 | 71.1 | 5.04E-07 | 0.65  | 0     | -    | 0.83  | 0     | -    | 0.24432 | 29.71024  | 84 | 0.19367 | 0.10029  | 0.09927  | 125.03145 |
| Rh_FR_SNP109 | 2 | 71.1 | 5.05E-07 | -     | 0     | 0.68 | -     | 0     | 0.85 | 0.66418 | 29.58948  | 86 | 0.19209 | 0.07862  | 0.18120  | 143.47759 |
| Rh_FR_SNP110 | 2 | 71.1 | 7.70E-07 | -     | 0     | 0.65 | -     | 0     | 0.85 | 0.65217 | 28.44137  | 87 | 0.18496 | 0.11940  | 0.08105  | 133.85932 |
| Rh_FR_SNP111 | 2 | 71.1 | 1.24E-06 | 0.84  | 0     | -    | 1.06  | 0     | -    | 0.29310 | 27.41155  | 83 | 0.19675 | 0.12803  | 0.11988  | 142.15625 |
| Rh_FR_SNP112 | 2 | 71.1 | 1.54E-06 | 1.54  | 0.7   | 0    | 1.6   | 0.54  | 0    | 0.31288 | 15.96163  | 79 | 0.21570 | 0.11801  | 0.13047  | 133.98968 |
| Rh_FR_SNP119 | 2 | 71.2 | 1.86E-08 | 0     | 0.51  | 1.48 | 0     | 0.43  | 1.72 | 0.58209 | 22.48695  | 80 | 0.26159 | 0.05862  | 0.19449  | 129.02518 |
| Rh_FR_SNP120 | 2 | 71.3 | 4.23E-09 | 0.79  | 0     | -    | -     | 0.98  | 0    | 0.25269 | 42.54233  | 89 | 0.24312 | 0.06990  | 0.16723  | 138.84500 |
| Rh_FR_SNP121 | 2 | 71.3 | 7.75E-08 | 0.79  | 0     | -    | 0.96  | 0     | -    | 0.22289 | 35.10367  | 80 | 0.22794 | 0.07438  | 0.17661  | 129.99559 |
| Rh_FR_SNP123 | 2 | 71.6 | 7.65E-09 | -     | 0     | 0.8  | -     | 0     | 0.99 | 0.66176 | 41.03591  | 87 | 0.24659 | 0.06605  | 0.17661  | 137.03683 |
| Rh_FR_SNP122 | 2 | 71.6 | 2.32E-08 | -     | 0     | 0.81 | -     | 0     | 1    | 0.66667 | 38.24797  | 83 | 0.24804 | 0.08064  | 0.16277  | 133.43321 |
| Rh_FR_SNP124 | 2 | 71.8 | 1.88E-10 | 0.95  | 0     | -    | 1.25  | 0     | -    | 0.3125  | 54.29430  | 76 | 0.24872 | 2.34E-06 | 0.23442  | 105.04948 |
| Rh_FR_SNP125 | 2 | 71.8 | 1.19E-09 | 0.92  | 0     | -    | 1.15  | 0     | -    | 0.28659 | 47.85226  | 78 | 0.30637 | 0.09811  | 0.11685  | 121.41144 |
| Rh_FR_SNP126 | 2 | 72   | 6.51E-07 | -     | 0     | 0.76 | -     | 0     | 0.93 | 0.63265 | 28.72202  | 90 | 0.18396 | 0.09500  | 0.15678  | 150.14887 |
| Rh_FR_SNP134 | 2 | 72.3 | 8.72E-12 | -     | 0     | 0.9  | -     | 0     | 1.14 | 0.66667 | 62.74403  | 85 | 0.30908 | 0.00975  | 0.24317  | 125.25879 |
| Rh_FR_SNP132 | 2 | 72.3 | 6.34E-10 | 0.92  | 0     | -    | 1.22  | 0     | -    | 0.28090 | 48.73638  | 85 | 0.26628 | 0.02389  | 0.23953  | 131.89991 |
| Rh_FR_SNP131 | 2 | 72.3 | 4.40E-09 | 0.91  | 0     | -    | 1.21  | 0     | -    | 0.25625 | 43.90973  | 77 | 0.25232 | 0.03870  | 0.19708  | 113.89254 |
| Rh_FR_SNP128 | 2 | 72.3 | 8.24E-09 | -     | 0     | 0.81 | -     | 0     | 0.97 | 0.66165 | 41.02967  | 85 | 0.21964 | 3.03E-06 | 0.30260  | 137.97491 |
| Rh_FR_SNP133 | 2 | 72.3 | 1.05E-08 | -     | 0     | 0.76 | -     | 0     | 1    | 0.66418 | 40.22189  | 86 | 0.23133 | 0.09148  | 0.10657  | 127.15230 |
| Rh_FR_SNP129 | 2 | 72.3 | 3.43E-07 | 0.71  | 0     | -    | 0.84  | 0     | -    | 0.25543 | 30.48626  | 88 | 0.18019 | 0.02608  | 0.28904  | 152.55182 |
| Rh_FR_SNP127 | 2 | 72.3 | 5.28E-07 | -     | 0     | 0.69 | -     | 0     | 0.85 | 0.64626 | 29.16017  | 92 | 0.17625 | 0.07138  | 0.19730  | 154.76846 |
| Rh_FR_SNP130 | 2 | 72.3 | 9.11E-07 | 0.7   | 0     | -    | 0.83  | 0     | -    | 0.26630 | 27.95934  | 88 | 0.17258 | 0.04249  | 0.26089  | 152.49368 |
| Rh_FR_SNP135 | 2 | 72.4 | 4.64E-09 | -     | 0     | 0.91 | -     | 0     | 1.24 | 0.64865 | 45.06588  | 69 | 0.29184 | 0.08320  | 0.06444  | 85.16013  |
| Rh_FR_SNP136 | 2 | 72.4 | 3.23E-07 | -     | 0     | 0.91 | -     | 0     | 1.26 | 0.28977 | 30.89259  | 84 | 0.19675 | 0.03495  | 0.27187  | 145.32536 |
| Rh_FR_SNP139 | 2 | 72.5 | 3.39E-11 | 1.04  | 0     | -    | 1.33  | 0     | -    | 0.28125 | 60.23695  | 76 | 0.36469 | 0.11111  | 0.06923  | 110.70580 |
| Rh_FR_SNP138 | 2 | 72.5 | 5.60E-11 | 1.53  | 0.45  | 0    | 1.81  | 0.39  | 0    | 0.31847 | 32.87388  | 76 | 0.34506 | 0.08992  | 0.09538  | 109.41951 |
| Rh_FR_SNP137 | 2 | 72.5 | 1.27E-10 | -     | 0     | 0.98 | -     | 0     | 1.28 | 0.63704 | 54.17845  | 83 | 0.31003 | 0.10725  | 0.05505  | 109.90807 |
| Rh_FR_SNP142 | 2 | 72.6 | 4.66E-13 | -     | 0     | 0.95 | -     | 0     | 1.2  | 0.66912 | 72.31188  | 88 | 0.32699 | 0.02909  | 0.18926  | 123.27256 |
| Rh_FR_SNP146 | 2 | 72.6 | 3.78E-12 | -     | 0     | 0.88 | -     | 0     | 1.13 | 0.65957 | 64.47222  | 90 | 0.29811 | 0.02093  | 0.21782  | 131.53215 |
| Rh_FR_SNP144 | 2 | 72.6 | 3.07E-11 | 0.9   | 0     | -    | 1.13  | 0     | -    | 0.22561 | 60.07126  | 78 | 0.28757 | 0.00469  | 0.24118  | 112.59343 |
| Rh_FR_SNP141 | 2 | 72.6 | 7.69E-11 | -     | 0     | 0.86 | -     | 0     | 1.12 | 0.66187 | 54.74402  | 89 | 0.28028 | 0.04678  | 0.18590  | 132.79756 |
| Rh_FR_SNP140 | 2 | 72.6 | 5.57E-10 | -     | 0     | 0.82 | -     | 0     | 1.09 | 0.65926 | 48.98786  | 86 | 0.27672 | 0.09219  | 0.09376  | 123.69112 |
| Rh_FR_SNP143 | 2 | 72.6 | 2.82E-09 | -     | 0     | 0.76 | -     | 0     | 1.02 | 0.68644 | 45.13802  | 78 | 0.26475 | 0.06470  | 0.09876  | 97.69155  |
| Rh_FR_SNP145 | 2 | 72.6 | 4.81E-07 | 0.98  | 0     | -    | 1.26  | 0     | -    | 0.13710 | 32.24373  | 58 | 0.28689 | 0.05605  | 0.19891  | 92.08124  |
| Rh_FR_SNP147 | 2 | 72.7 | 6.20E-19 | 1.25  | 0     | -    | 1.23  | 0     | -    | 0.41667 | 163.87127 | 62 | 0.43942 | 0.18541  | 0.00486  | 99.73949  |
| Rh_FR_SNP150 | 2 | 72.7 | 2.05E-11 | -     | 0     | 0.9  | -     | 0     | 1.17 | 0.67424 | 59.61982  | 86 | 0.31145 | 0.03707  | 0.19025  | 125.36550 |
| Rh_FR_SNP149 | 2 | 72.7 | 1.16E-10 | 0.85  | 0     | -    | 1.13  | 0     | -    | 0.25275 | 53.77134  | 87 | 0.28141 | 0.07285  | 0.13260  | 126.17484 |
| Rh_FR_SNP148 | 2 | 72.7 | 1.95E-09 | 0.85  | 0     | -    | 1.09  | 0     | -    | 0.22785 | 46.79502  | 75 | 0.30161 | 0.13033  | 0.01236  | 93.95464  |
| Rh_FR_SNP151 | 2 | 72.8 | 4.11E-49 | -0.33 | -0.21 | 0    | -0.43 | -0.41 | 0    | 0.45614 | 1392.559  | 58 | 0.88688 | 0.23961  | 2.40E-06 | 106.82612 |
| Rh_FR_SNP160 | 2 | 72.8 | 6.64E-13 | 0.95  | 0     | -    | 1.2   | 0     | -    | 0.25543 | 71.03466  | 88 | 0.31044 | 2.52E-06 | 0.25163  | 127.86169 |

|              |   |      |          |      |      |      |      |      |      |         |          |    |         |          |         |           |
|--------------|---|------|----------|------|------|------|------|------|------|---------|----------|----|---------|----------|---------|-----------|
| Rh_FR_SNP152 | 2 | 72.8 | 1.44E-12 | -    | 0    | 0.93 | -    | 0    | 1.19 | 0.66667 | 68.02521 | 89 | 0.31463 | 0.02841  | 0.19879 | 126.95835 |
| Rh_FR_SNP153 | 2 | 72.8 | 2.51E-12 | -    | 0    | 0.93 | -    | 0    | 1.19 | 0.66667 | 66.10609 | 89 | 0.31112 | 0.03078  | 0.19745 | 127.89891 |
| Rh_FR_SNP159 | 2 | 72.8 | 4.29E-10 | 0.8  | 0    | -    | 1.07 | 0    | -    | 0.25    | 50.10519 | 84 | 0.25320 | 0.03630  | 0.15980 | 111.41582 |
| Rh_FR_SNP155 | 2 | 72.8 | 2.82E-09 | -    | 0    | 0.83 | -    | 0    | 1.13 | 0.64706 | 44.18746 | 85 | 0.25396 | 0.03553  | 0.23156 | 134.90576 |
| Rh_FR_SNP158 | 2 | 72.8 | 4.48E-09 | -    | 0    | 0.89 | -    | 0    | 1.11 | 0.69027 | 44.00323 | 76 | 0.25736 | 0.02182  | 0.26313 | 123.58101 |
| Rh_FR_SNP154 | 2 | 72.8 | 1.87E-08 | 0.9  | 0    | -    | 1.2  | 0    | -    | 0.27381 | 39.18917 | 80 | 0.25787 | 0.08245  | 0.16093 | 130.31732 |
| Rh_FR_SNP156 | 2 | 72.8 | 7.73E-08 | -    | 0    | 0.67 | -    | 0    | 1    | 0.66667 | 35.59680 | 75 | 0.24933 | 0.11523  | 0.04733 | 99.11055  |
| Rh_FR_SNP157 | 2 | 72.8 | 7.49E-07 | -    | 0    | 0.7  | -    | 0    | 0.91 | 0.69725 | 29.39573 | 73 | 0.17822 | 0.02085  | 0.21614 | 104.95468 |
| Rh_FR_SNP161 | 2 | 72.9 | 2.66E-10 | 0    | 0.3  | 1.33 | 0    | 0.21 | 1.59 | 0.58741 | 28.99573 | 85 | 0.31398 | 0.11567  | 0.04601 | 112.96186 |
| Rh_FR_SNP165 | 2 | 72.9 | 8.05E-10 | -    | 0    | 0.84 | -    | 0    | 1.04 | 0.65714 | 47.45656 | 89 | 0.24137 | 2.94E-06 | 0.29387 | 141.96850 |
| Rh_FR_SNP164 | 2 | 72.9 | 1.75E-09 | -    | 0    | 0.84 | -    | 0    | 1.04 | 0.66418 | 45.49512 | 86 | 0.24810 | 2.98E-06 | 0.29821 | 139.37934 |
| Rh_FR_SNP163 | 2 | 72.9 | 2.76E-09 | 0.81 | 0    | -    | 1.02 | 0    | -    | 0.25275 | 44.02123 | 87 | 0.21938 | 2.94E-06 | 0.29352 | 138.63979 |
| Rh_FR_SNP162 | 2 | 72.9 | 7.01E-09 | -    | 0    | 0.97 | -    | 0    | 1.35 | 0.62143 | 41.61253 | 84 | 0.26256 | 0.09220  | 0.13973 | 135.66216 |
| Rh_FR_SNP166 | 2 | 73   | 3.61E-10 | -    | 0    | 0.97 | -    | 0    | 1.29 | 0.63309 | 50.49035 | 85 | 0.28892 | 0.05809  | 0.17278 | 128.90261 |
| Rh_FR_SNP167 | 2 | 73   | 1.73E-09 | -    | 0    | 0.93 | -    | 0    | 1.22 | 0.62759 | 45.28156 | 88 | 0.26057 | 0.06840  | 0.16304 | 136.07973 |
| Rh_FR_SNP170 | 2 | 73   | 8.36E-09 | 0.83 | 0    | -    | 1.01 | 0    | -    | 0.26437 | 41.09490 | 84 | 0.22653 | 3.14E-06 | 0.31359 | 140.29947 |
| Rh_FR_SNP175 | 2 | 73   | 9.28E-09 | -    | 0    | 0.88 | -    | 0    | 1.03 | 0.67480 | 41.24719 | 80 | 0.22335 | 3.09E-06 | 0.30855 | 132.30665 |
| Rh_FR_SNP172 | 2 | 73   | 1.17E-08 | 0    | 0.58 | 1.48 | 0    | 0.5  | 1.71 | 0.56757 | 22.75819 | 87 | 0.25539 | 0.08210  | 0.14144 | 134.66521 |
| Rh_FR_SNP169 | 2 | 73   | 2.76E-08 | 0.89 | 0    | -    | 1.16 | 0    | -    | 0.31818 | 38.85762 | 73 | 0.26026 | 0.13750  | 0.01321 | 95.61955  |
| Rh_FR_SNP168 | 2 | 73   | 4.47E-08 | -    | 0    | 0.82 | -    | 0    | 0.99 | 0.67213 | 36.76405 | 79 | 0.23520 | 0.01733  | 0.29315 | 133.44375 |
| Rh_FR_SNP173 | 2 | 73   | 6.32E-08 | 0    | 0.59 | 1.48 | 0    | 0.46 | 1.67 | 0.57333 | 20.17749 | 88 | 0.23690 | 0.09554  | 0.13515 | 142.00536 |
| Rh_FR_SNP174 | 2 | 73   | 2.75E-07 | -    | 0    | 0.73 | -    | 0    | 0.85 | 0.68333 | 31.67255 | 79 | 0.19084 | 3.11E-06 | 0.31119 | 130.30300 |
| Rh_FR_SNP171 | 2 | 73   | 7.05E-07 | -    | 0    | 0.74 | -    | 0    | 0.9  | 0.67769 | 29.13581 | 79 | 0.18148 | 3.20E-06 | 0.31970 | 132.40568 |
| Rh_FR_SNP179 | 2 | 73.1 | 1.09E-08 | -    | 0    | 0.83 | -    | 0    | 1.1  | 0.68750 | 41.55467 | 74 | 0.28512 | 0.09677  | 0.09728 | 108.42398 |
| Rh_FR_SNP177 | 2 | 73.1 | 1.11E-08 | 0.79 | 0    | -    | 0.98 | 0    | -    | 0.27778 | 40.05845 | 86 | 0.22457 | 0.00241  | 0.30614 | 142.77827 |
| Rh_FR_SNP178 | 2 | 73.1 | 1.40E-07 | 1.12 | 0.15 | 0    | 1.36 | 0.12 | 0    | 0.31034 | 19.80777 | 73 | 0.25908 | 0.12744  | 0.04025 | 99.69293  |
| Rh_FR_SNP176 | 2 | 73.1 | 3.23E-07 | 0.76 | 0    | -    | 0.98 | 0    | -    | 0.65421 | 32.31039 | 67 | 0.25240 | 0.07097  | 0.17295 | 106.60755 |
| Rh_FR_SNP182 | 2 | 73.2 | 3.01E-09 | -    | 0    | 0.82 | -    | 0    | 0.99 | 0.66176 | 43.76106 | 87 | 0.23117 | 3.03E-06 | 0.30258 | 141.25338 |
| Rh_FR_SNP181 | 2 | 73.2 | 5.53E-09 | 0.78 | 0    | -    | 0.93 | 0    | -    | 0.26316 | 41.57361 | 91 | 0.21542 | 3.03E-06 | 0.30308 | 147.97320 |
| Rh_FR_SNP184 | 2 | 73.2 | 4.07E-08 | -    | 0    | 0.76 | -    | 0    | 0.94 | 0.67717 | 36.64724 | 83 | 0.19966 | 2.91E-06 | 0.29145 | 131.61135 |
| Rh_FR_SNP180 | 2 | 73.2 | 1.52E-07 | 0.77 | 0    | -    | 0.93 | 0    | -    | 0.25294 | 33.14624 | 81 | 0.19487 | 0.01618  | 0.27533 | 131.59465 |
| Rh_FR_SNP183 | 2 | 73.2 | 2.00E-07 | -    | 0    | 0.76 | -    | 0    | 0.89 | 0.68033 | 32.47467 | 80 | 0.19926 | 3.15E-06 | 0.31549 | 134.06365 |
| Rh_FR_SNP185 | 2 | 73.3 | 1.21E-09 | -    | 0    | 0.89 | -    | 0    | 1.1  | 0.70476 | 49.11829 | 71 | 0.27959 | 0.07620  | 0.10737 | 97.35702  |
| Rh_FR_SNP190 | 2 | 73.3 | 2.59E-08 | -    | 0    | 0.73 | -    | 0    | 1    | 0.67164 | 37.56688 | 87 | 0.23003 | 0.09222  | 0.11174 | 129.19441 |
| Rh_FR_SNP186 | 2 | 73.3 | 4.44E-08 | -    | 0    | 0.75 | -    | 0    | 1    | 0.68595 | 36.68212 | 80 | 0.24619 | 0.09569  | 0.10083 | 117.82347 |
| Rh_FR_SNP189 | 2 | 73.3 | 9.76E-08 | 0.76 | 0    | -    | 0.98 | 0    | -    | 0.27222 | 33.97661 | 86 | 0.21346 | 0.05575  | 0.21485 | 142.28384 |
| Rh_FR_SNP188 | 2 | 73.3 | 1.69E-07 | 1.22 | 0.28 | 0    | 1.44 | 0.16 | 0    | 0.33129 | 19.02382 | 82 | 0.24055 | 0.10278  | 0.13304 | 132.68007 |
| Rh_FR_SNP187 | 2 | 73.3 | 3.04E-07 | -    | 0    | 0.78 | -    | 0    | 0.93 | 0.69298 | 31.63191 | 76 | 0.17833 | 3.07E-06 | 0.30695 | 125.26785 |
| Rh_FR_SNP191 | 2 | 73.3 | 4.68E-07 | -    | 0    | 0.68 | -    | 0    | 0.87 | 0.66917 | 29.79050 | 86 | 0.16312 | 0.00593  | 0.29254 | 140.69665 |

|              |   |      |          |       |       |       |       |       |       |         |           |    |         |         |          |           |
|--------------|---|------|----------|-------|-------|-------|-------|-------|-------|---------|-----------|----|---------|---------|----------|-----------|
| Rh_FR_SNP192 | 2 | 73.4 | 1.96E-07 | 0.75  | 0     | -     | 0.94  | 0     | -     | 0.22989 | 32.30651  | 83 | 0.19193 | 0.01605 | 0.28647  | 137.67042 |
| Rh_FR_SNP193 | 2 | 73.4 | 1.33E-06 | 0.92  | 0.17  | 0     | 1.11  | 0.08  | 0     | 0.26144 | 16.38175  | 74 | 0.21677 | 0.08980 | 0.11890  | 111.76760 |
| Rh_FR_SNP197 | 2 | 73.5 | 2.96E-07 | -     | 0     | 0.73  | -     | 0     | 0.9   | 0.67164 | 30.93136  | 87 | 0.18768 | 0.02567 | 0.28749  | 149.08067 |
| Rh_FR_SNP196 | 2 | 73.5 | 2.98E-07 | -     | 0     | 0.71  | -     | 0     | 0.89  | 0.66667 | 30.79841  | 89 | 0.18340 | 0.02651 | 0.28093  | 151.20740 |
| Rh_FR_SNP195 | 2 | 73.5 | 4.64E-07 | -     | 0     | 0.7   | -     | 0     | 0.9   | 0.66187 | 29.64457  | 89 | 0.18886 | 0.05342 | 0.22728  | 149.12329 |
| Rh_FR_SNP194 | 2 | 73.5 | 5.99E-07 | -     | 0     | 0.69  | -     | 0     | 0.9   | 0.66187 | 28.98649  | 89 | 0.18641 | 0.06573 | 0.20586  | 148.43425 |
| Rh_FR_SNP199 | 2 | 73.7 | 1.40E-08 | 1.24  | 0.24  | 0     | 1.56  | 0.26  | 0     | 0.33962 | 22.86509  | 81 | 0.26370 | 0.06495 | 0.16664  | 123.24693 |
| Rh_FR_SNP198 | 2 | 73.7 | 1.91E-07 | 1.22  | 0.31  | 0     | 1.42  | 0.26  | 0     | 0.34091 | 18.61981  | 87 | 0.22062 | 0.07610 | 0.16086  | 136.67191 |
| Rh_FR_SNP200 | 3 | 6.8  | 9.89E-08 | 0     | 0.48  | 1.6   | 0     | 0.68  | 2.05  | 0.48193 | 19.81364  | 82 | 0.25530 | 0.16076 | 0.06303  | 135.41198 |
| Rh_FR_SNP201 | 3 | 7.3  | 4.27E-11 | 0     | -1.21 | -     | 0     | -1.25 | -     | 0.43671 | 59.68497  | 75 | 0.35107 | 0.16990 | 0.02489  | 115.58685 |
| Rh_FR_SNP203 | 3 | 8.9  | 1.45E-10 | -     | -1.32 | 0     | -     | -1.37 | 0     | 0.53636 | 62.33968  | 55 | 0.42908 | 0.18392 | 0.02410  | 85.34578  |
| Rh_FR_SNP202 | 3 | 8.9  | 8.58E-08 | 1.51  | 0.35  | 0     | 1.85  | 0.4   | 0     | 0.475   | 20.13486  | 80 | 0.27374 | 0.14675 | 0.06062  | 127.07123 |
| Rh_FR_SNP204 | 3 | 9.2  | 6.62E-07 | 0     | 0.55  | 1.63  | 0     | 0.71  | 2.02  | 0.49342 | 17.34977  | 75 | 0.25378 | 0.14224 | 0.08036  | 122.71587 |
| Rh_FR_SNP205 | 3 | 9.9  | 1.83E-07 | 0     | 0.47  | 1.59  | 0     | 0.62  | 2.01  | 0.48765 | 19.00501  | 80 | 0.25086 | 0.14510 | 0.06920  | 129.28866 |
| Rh_FR_SNP206 | 3 | 10.4 | 5.78E-07 | 0     | 0.23  | 1.45  | 0     | 0.19  | 1.69  | 0.48538 | 17.16325  | 84 | 0.23155 | 0.17702 | 0.05925  | 145.63252 |
| Rh_FR_SNP207 | 3 | 12.3 | 5.31E-07 | 0     | -1.1  | -1.33 | 0     | -1.43 | -1.75 | 0.51299 | 17.40264  | 81 | 0.23456 | 0.14466 | 0.07136  | 132.19418 |
| Rh_FR_SNP208 | 3 | 12.3 | 1.08E-06 | 0     | -1.09 | -1.36 | 0     | -1.42 | -1.83 | 0.50658 | 16.47311  | 79 | 0.23393 | 0.16378 | 0.07151  | 135.38432 |
| Rh_FR_SNP209 | 3 | 12.4 | 9.41E-07 | 0     | -1.12 | -1.37 | 0     | -1.17 | -1.56 | 0.55556 | 16.83645  | 75 | 0.24853 | 0.16769 | 0.06209  | 123.60556 |
| Rh_FR_SNP210 | 4 | 47.5 | 2.11E-07 | -     | 1.06  | 0     | -     | 0.54  | 0     | 0.53061 | 32.73330  | 75 | 0.23335 | 0.23793 | 0.03626  | 144.06074 |
| Rh_FR_SNP211 | 5 | 3.7  | 1.66E-06 | -     | 0     | 0.69  | -     | 0     | 0.71  | 0.58503 | 26.66544  | 83 | 0.18713 | 0.18156 | 0.04125  | 137.07428 |
| Rh_FR_SNP212 | 5 | 13.2 | 2.32E-07 | -0.84 | 0     | -     | -0.87 | 0     | -     | 0.09375 | 32.38634  | 76 | 0.21729 | 0.16909 | 0.03552  | 126.12204 |
| Rh_FR_SNP213 | 5 | 55.9 | 7.78E-84 | -     | 0.44  | 0     | -     | 0.29  | 0     | 0.67368 | 35809.117 | 60 | 0.75329 | 0.21454 | 2.15E-06 | 103.87214 |
| Rh_FR_SNP214 | 5 | 73.9 | 7.89E-53 | -     | 0.12  | 0     | -     | 0.04  | 0     | 0.55172 | 3131.007  | 60 | 0.75267 | 0.21610 | 2.16E-06 | 100.16309 |
| Rh_FR_SNP215 | 7 | 27.2 | 1.03E-12 | -0.12 | -0.21 | 0     | 0.16  | -0.14 | 0     | 0.44094 | 43.82248  | 65 | 0.44181 | 0.24352 | 7.76E-05 | 111.36610 |
| Rh_FR_SNP216 | 7 | 28.8 | 8.79E-13 | 0     | -0.74 | -1.35 | 0     | -0.09 | -0.57 | 0.45562 | 39.51273  | 84 | 0.37987 | 0.25315 | 0.01584  | 150.63016 |
| Rh_FR_SNP217 | 7 | 40.9 | 1.62E-42 | 0     | 0.1   | -     | 0     | -0.13 | -     | 0.28571 | 1987.216  | 52 | 0.90520 | 0.23420 | 2.34E-06 | 100.67248 |
| Rh_FR_SNP218 | 7 | 65.4 | 2.94E-11 | 0     | -1.28 | -1.21 | 0     | -0.81 | -0.91 | 0.54967 | 32.94340  | 84 | 0.34112 | 0.21710 | 0.02028  | 147.11140 |

<sup>1)</sup> The effect of the genotypic class with the lowest frequency is set to zero. The effects of the other genotypic classes are given as deviations between their estimated values and the lowest frequency class.
